# Supplementary material for: Axon-Seq Decodes the Motor Axon Transcriptome and Its Modulation in Response to ALS
Source: PubMed Central journal article supplement (PMC6294264; doi:10.1016/j.stemcr.2018.11.005), 2018-12-11
Supplement: mmc7.pdf [file mmc7.pdf]

# Axon-Seq Decodes the Motor Axon Transcriptome and Its Modulation in Response to ALS

Jik Nijssen,<sup>1,3</sup> Julio Aguila,<sup>1,3</sup> Rein Hoogstraaten,<sup>1,2</sup> Nigel Kee,<sup>1</sup> and Eva Hedlund<sup>1,\*</sup>

<sup>1</sup>Department of Neuroscience, Karolinska Institutet, Stockholm 171 77, Sweden

<sup>2</sup>Department of Translational Neuroscience, Brain Center Rudolf Magnus, UMC Utrecht, Utrecht 3984 CG, Netherlands

<sup>3</sup>Co-first author

\*Correspondence: [eva.hedlund@ki.se](mailto:eva.hedlund@ki.se)

<https://doi.org/10.1016/j.stemcr.2018.11.005>

## SUMMARY

Spinal motor axons traverse large distances to innervate target muscles, thus requiring local control of cellular events for proper functioning. To interrogate axon-specific processes we developed Axon-seq, a refined method incorporating microfluidics, RNA sequencing (RNA-seq), and bioinformatic quality control. We show that the axonal transcriptome is distinct from that of somas and contains fewer genes. We identified 3,500–5,000 transcripts in mouse and human stem cell-derived spinal motor axons, most of which are required for oxidative energy production and ribogenesis. Axons contained transcription factor mRNAs, e.g., *Ybx1*, with implications for local functions. As motor axons degenerate in amyotrophic lateral sclerosis (ALS), we investigated their response to the *SOD1*<sup>G93A</sup> mutation, identifying 121 ALS-dysregulated transcripts. Several of these are implicated in axonal function, including *Nrp1*, *Dbn1*, and *Nek1*, a known ALS-causing gene. In conclusion, Axon-seq provides an improved method for RNA-seq of axons, increasing our understanding of peripheral axon biology and identifying therapeutic targets in motor neuron disease.

## INTRODUCTION

Spinal motor neurons (MNs) are highly polarized cells. Their somas and dendrites are located in the spinal cord, while their axons traverse the body and connect to muscle fibers. The large distance between the MN soma and its synapse implies that the distal axon must contain a microenvironment able to independently respond to internal and external triggers. Vesicles containing proteins and RNAs travel slowly, at 0.1–10 mm per day (Lasek et al., 1984). Thus, protein transport alone does not suffice to sustain the dynamics of the axon and synapse. Local synaptic translation is important for temporal control of protein synthesis and synaptic plasticity (Holt and Schuman, 2013).

Motor axons and their specialized synapses with muscle, termed neuromuscular junctions (NMJs), are primary targets in the lethal disease amyotrophic lateral sclerosis (ALS). MNs undergo progressive degeneration in ALS, resulting in denervation of muscle, paralysis, and ultimately death at 3–5 years post-diagnosis (Swinnen and Robberecht, 2014). Notably, MNs follow a distinct “dying-back” pattern of degeneration in ALS. Muscle denervation and axonal retraction occur before MN somas in the spinal cord are lost, implying that the NMJ is a highly vulnerable entity of the MN (Comley et al., 2016; Fischer et al., 2004). Mutations in several genes, including *SOD1*, *C9orf72*, *TARDBP*, and *FUS*, cause ALS (DeJesus-Hernandez et al., 2011; Kwiatkowski et al., 2009; Rosen et al., 1993; Sreedharan et al., 2008;

Vance et al., 2009). However, expression of these genes is not MN restricted. Why and how MNs are selectively affected in ALS is unclear. Studying the RNA composition of the distal MN axon may illuminate mechanisms driving the specific dying-back degeneration observed in ALS.

Previous efforts to isolate axons *in vitro* have used well insets, Campenot chambers, or microfluidic devices (Boyd, 1962; Campenot, 1977; Taylor et al., 2005). While these can separate axons from somas, residual cross-contamination between compartments can still occur. Thus, axonal fractions can be contaminated with other cellular components or non-neuronal cells. In this way, RNA-sequencing efforts aimed at isolating the axonal transcriptome (Briese et al., 2016; Minis et al., 2014; Rotem et al., 2017; Saal et al., 2014) can be easily undermined if the purity of the axonal fractions is not carefully examined. To accurately investigate motor axon mRNA composition and its modulation in ALS we developed Axon-seq, an application of our spatial single-cell RNA-sequencing technique (Nichterwitz et al., 2016) to microfluidic devices housing mouse embryonic stem cell (mESC)-derived MNs. In contrast to previous methods, Axon-seq does not require RNA isolation and allows high sensitivity and cost-efficient sequencing from a single microfluidic device. Importantly, Axon-seq utilizes a stringent and sensitive bioinformatic quality control (QC) step that identifies samples containing trace levels of mRNA from undesired cell somas, effectively eliminating all cellular cross-contamination.

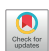

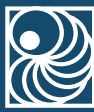

## RESULTS

### Axon-Seq Is a Refined Method that Enables RNA Sequencing of Axons from a Single Microfluidic Device

To investigate transcriptional changes in motor axons in health and ALS we used mESC-derived MNs (Wichterle et al., 2002) from a control Hb9-GFP line or cells overexpressing the human mutated SOD1<sup>G93A</sup> protein. We first confirmed the MN subtype identity of our cultures through bulk RNA sequencing and cross-comparison with single MNs (Nichterwitz et al., 2016). We observed expression of the MN transcription factors (TFs) *Isl1* and *Foxp1* in our cultures (Figure S1A), indicating that MNs of a lateral motor column (LMC) identity were generated (Dasen et al., 2008). mRNAs of the *Hox1–8* families were detected, which define a cervical to thoracic spinal identity as well as brainstem MNs. Expression of *Phox2b* confirmed that a proportion of brain-stem MNs were generated in addition to spinal MNs (Figure S1A). After being plated in microfluidic devices, motor axons were recruited to the vacant chamber by a gradient of glial cell line-derived neurotrophic factor (GDNF) and brain-derived neurotrophic factor (BDNF) (Figures 1A and 1F). An initial concentration of 50 ng/mL of GDNF/BDNF was followed by a lower concentration of 5 ng/mL, once axons had crossed the microchannels, to avoid growth cone collapse (Figure 1A). The HB9-eGFP reporter signal was detectable in motor axons and in somas where it co-localized with *Isl1/2* (Figure 1B). We next stained for *Map2* and *Mapt* (*Tau*) (Figures 1C, 1D, and S1B). In mature neurons, *Map2* labels dendrites, while *Tau* labels axons (Garner et al., 1988; Litman et al., 1993). The majority of processes crossing the channels were *Tau* positive, while a minority were *Map2* positive. Thus, axonal processes were enriched compared with dendrites. MN cultures derived from mESCs also contain interneurons. However, since 90.75% ± 4.8% of *Tau*<sup>+</sup> processes were Hb9-GFP<sup>+</sup> and only a very low proportion of GFP-negative (and *Tau*-positive) axons appeared in the axonal compartment, we from here on refer to axonal preparations as motor axons.

Adding different volumes to the compartments generates a fluid flow that counteracts diffusion (Mills et al., 2018; Taylor et al., 2005). Using this principle, axonal samples were lysed without affecting the soma compartment (Figure 1G). Each compartment was lysed using 2% Triton X-100 in water, eliminating an RNA purification step. To allow sequencing of individual devices, we performed a vacuum centrifugation concentration step. This allowed using the entire lysate for cDNA library preparation. We then conducted RNA-seq on axonal and soma samples from individual devices using the Smart-seq2 protocol (Picelli et al., 2013) with minor modifications (Nichterwitz et al., 2016).

To be included in bioinformatics analysis, samples required >300,000 mapped reads, >0.4 correlation to at least one other sample, and >2,500 detected genes. We next implemented a crucial bioinformatic quality control (Axon-seq QC), excluding axon samples with trace levels of soma contamination. Here, we performed principal-component analysis (PCA) based on all expressed genes. The PC1 reflected the number of detected genes. Axonal transcriptomes occupied the lower ranges and somatodendritic samples occupied the higher ranges (Figure 1I). Three axonal samples were intermediate, with >7,500 detected genes, and likely contaminated with one or more somas and were discarded. Remaining high-quality axon samples contained ~3,500 detected genes at >1 reads per kilobase of transcript per million mapped reads (RPKM) and 5,000 detected genes at >0.1 RPKM, while somatodendritic samples contained approximately three times these numbers (Figure 1H). Axonal samples also displayed fewer detected genes compared to single MNs (Nichterwitz et al., 2016) (Figure S1F). Interestingly, despite this difference, the cDNA yields were comparable between axonal samples and single MNs (Figure S1E), suggesting that (1) the cDNA yield from all axons in a microfluidic device approaches that of one or two cells, and (2) low numbers of detected genes in these samples are not a technical artifact, but a trait unique to axons. Given that Axon-seq libraries display lower numbers of detected genes than do single MNs, a single contaminating cell has the potential to drastically alter the readout of an axonal library. We find that consideration of the number of detected genes is perfectly suited to identifying contaminated samples, allowing further downstream analysis on only pure axonal samples.

After QC, we sought to compare our dataset with previously published methods, selecting two RNA-seq studies (Table S1) that used either well insets (Rotem et al., 2017) or single microfluidic devices (Briese et al., 2016) to isolate motor axon transcriptomes. Both these studies display good-quality data and describe enrichment of axonal transcripts. Expression of neuronal markers in all samples was visualized in a heatmap, including, e.g., neurofilaments, peripherin, *Mapt*, *Gap43*, and the glial markers *Gfap*, *Aqp4*, *Eaat1*, *Iba1*, *Ccl3*, *Pdgfra*, *Sox10*, and *Mog* (Figure 1J). This clearly demonstrates that our Axon-seq samples passing QC expressed robust levels of neuronal and axonal markers. It also showed that our samples were devoid of glial markers and the proliferative marker *Ki67*, which were in fact present in all previously published axon sequencing samples (Figure 1J). Furthermore, our axon samples clustered away from somatodendritic samples and our cross-contaminated axon samples, while axon and soma samples from previous studies were intermingled (Figure 1J). Further cross-comparison of our axon samples with data derived from purified neuronal samples (Zhang

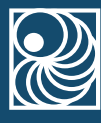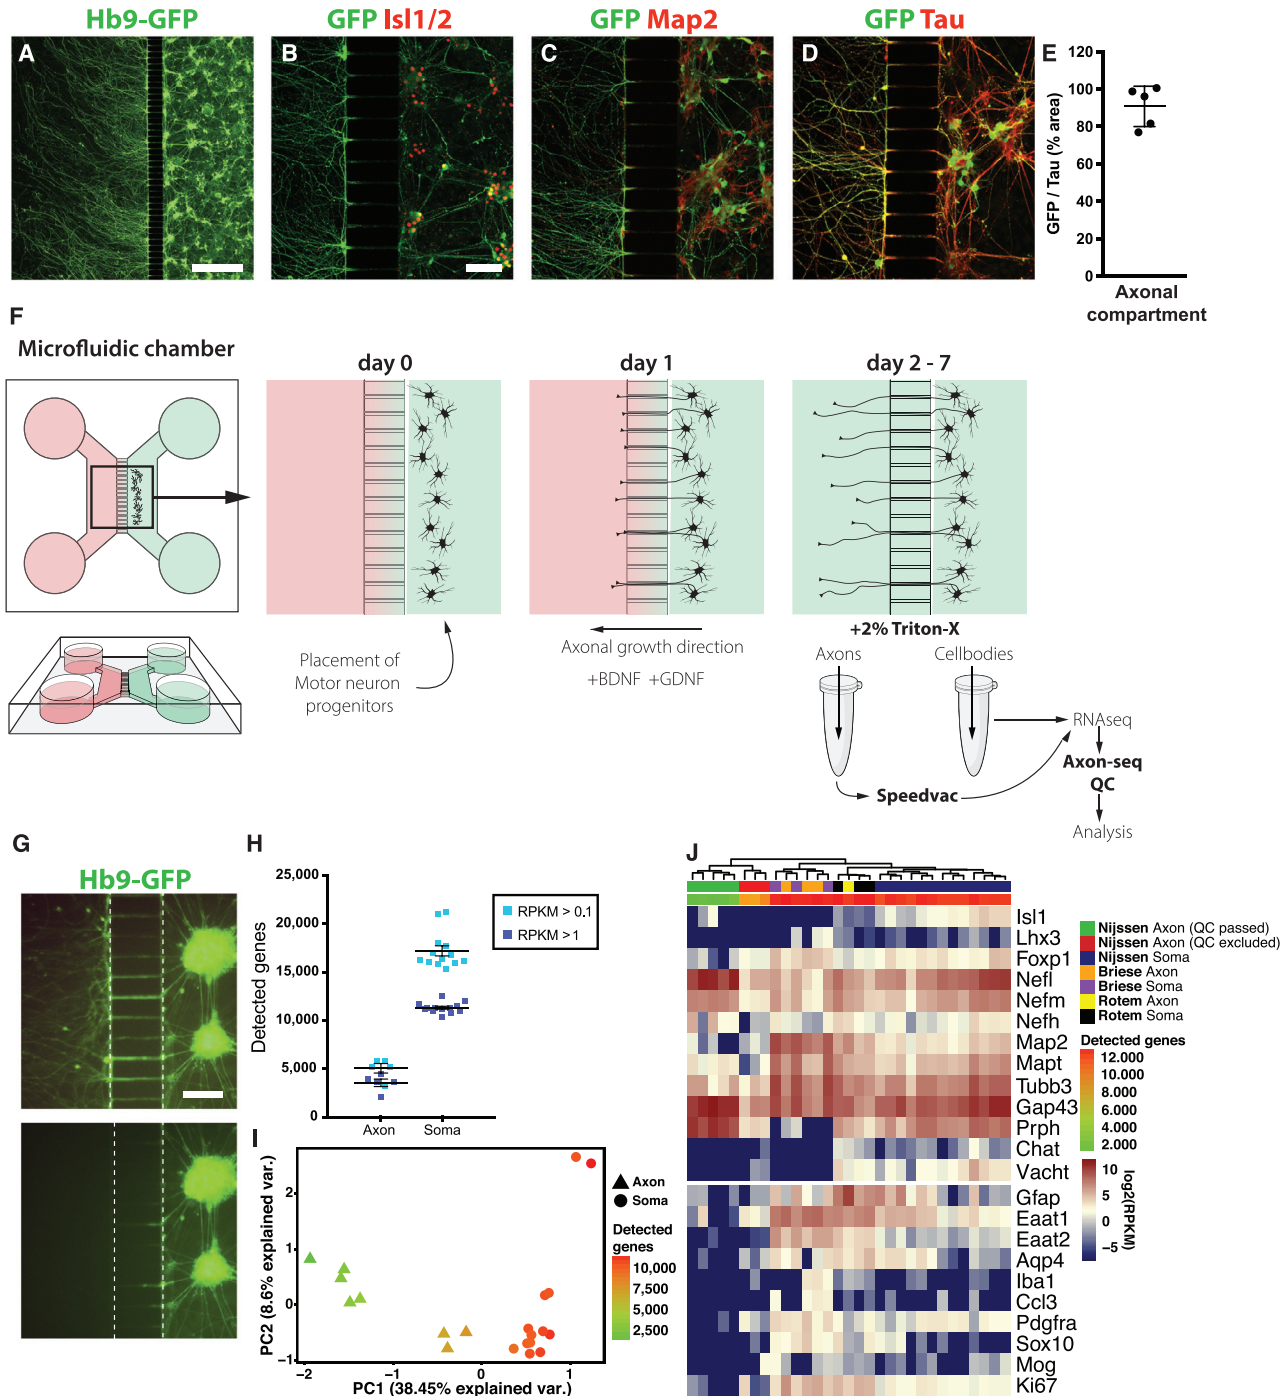

**Figure 1. Axon-Seq of Motor Axons in Single Microfluidic Devices**

(A and B) Anti-GFP immunofluorescence visualizes motor axons crossing the microgrooves and extending into the axonal compartment. MN somas are visualized with (A) Hb9-eGFP and (B) *Isl1/2* staining.

(C and D) Presence of Tau (*Mapt*) (D) but very little *Map2* (C) indicates that mainly axons cross over into the other compartment.

(E) Quantification of Hb9::eGFP<sup>+</sup> area over Tau<sup>+</sup> area reveals that the majority of crossing axons are motor axons (90.75% ± 4.8%). Data are represented as mean ± SEM.

(F) Overview of the methodology used. MNs are cultured in one compartment of the microfluidic device and axons are recruited across microgrooves using a gradient of trophic factors. Compartments are separately lysed and cDNA libraries prepared for RNA sequencing.

(legend continued on next page)

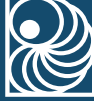

et al., 2014) confirmed their purity (Figure S1D). Importantly, our Axon-seq samples expectedly displayed a far lower number of detected genes than the previously published axon samples (Figure 1J). Thus, samples displaying even small levels of soma contamination were successfully identified through application of Axon-seq QC.

In summary, our analysis demonstrates the importance of extensive QC of axon transcriptome data with particular consideration for the number of detected genes and presents Axon-seq as a robust and significantly improved method for RNA-seq of axonal fractions from individual microfluidic devices with sensitivity similar to that of single-cell sequencing.

### Axons Have a Unique Transcriptional Profile and Are Particularly Enriched in Transcripts Important for Mitochondrial and Ribosomal Functions

We next sought to compare the transcriptome of axonal fractions with that of somatodendritic fractions. When transcripts present in at least 3 of 5 samples were considered, the axonal transcriptome comprised 4,238 genes (Table S2). Between axons and somas, 10,406 genes were differentially expressed. The majority of these (9,762) were soma enriched, while 644 transcripts were axon enriched (Table S2). Moreover, analysis of the top 100 differentially expressed genes in axons and somas clearly demonstrated that axons are not simply diluted somas, but instead have a unique mRNA profile (Figures S1G and S1H). PCA based on all expressed genes clearly distinguished axons from somas, with PC1 explaining 41.7% of the variance (Figure 2A). The top 20 genes causing PC1-negative loading, and thereby axonal identity, included several genes involved in the mitochondrial respiratory chain (*Cox6a1*, *Cox6b1*, *Cox8a*, *Cox4i1*, *Ndufa3*, *Ndufa7*, *Ndufb9*, *Ndufb11*), mitochondrial ATP synthesis (*Atp5k*, *Atp5j2*), ribosome subunits and transcriptional elongation (*Rpl41*, *Tceb2*), cytoskeleton organization (*Tmsb10*), copper delivery (*Atox1*), and mRNA splicing (*Ybx1*) (Figure 2B). PC1-positive loading (Figure 2A) was heavily influenced by transcripts present solely in somas. In total, 2,903 genes expressed at an average RPKM of >1 in somas were undetectable in axons (Figure S1H). Gene set enrichment analysis (GSEA) on axon-enriched genes uncovered pathways related to local

translation (Figures 2C and 2D), mitochondrial oxidative energy production (Figure 2E), and nonsense-mediated decay (Figure 2F). Interestingly, both nuclear- and mitochondrial-encoded transcripts were enriched in axons (Figures 2G and 2H), but the 10 most abundant energy production-related transcripts in axons were nuclear-encoded transcripts (Figure 2I).

To confirm axonal localization of particular transcripts we conducted *in situ* hybridization experiments using RNA-scope. Negative (*dapB*) and positive (*Ubc*, *Polr2a*, and *Ppib*, poly(A)) control probes demonstrated the specificity of the method (Figures S2A–S2C). We confirmed *Cox6a1* mRNA, which is part of the electron transport chain, to be localized to motor axons (Figure 2J) and somas (Figure S2D). Immunocytochemistry of motor axons demonstrated that also the Cox6a1 protein was readily detected in axons (Figure 2K).

In summary, our data show that axons of growing MNs are enriched for mRNAs related to ribosomes and oxidative phosphorylation, a large majority of which are mitochondrially produced. The distal axon compartment can thereby sustain local translation machinery and high energy metabolism, reflecting the enormous energy demands of growing axons.

### Motor Axons Show a Unique Transcription Factor Profile

Analysis of the top 50 most prevalent TF mRNAs in each of the two compartments uncovered 16 common TFs, including *Ybx1*, *Carhsp1*, and *Sub1* (Figures 3A and 3B). The majority of soma-enriched TF mRNAs were more abundant in somas than the most axon-enriched TFs were in axons (Figure 3B). However, 5 of the 10 most abundant axonal TF mRNAs were significantly enriched in this compartment compared to somas, including *Ybx1*, *Carhsp1*, *Pbx4*, *Hmga1*, and *Zfp580* (Figure 3C). The enrichment of *Ybx1* (Y-box binding protein 1,  $p < 0.001$ ) (Figure 3C) was particularly compelling since *Ybx1* partakes in, e.g., pre-mRNA transcription and splicing, mRNA packaging, and regulation of mRNA stability and translation (Lyabin et al., 2014a, 2014b). RNAscope confirmed the presence of *Ybx1* mRNA in Hb9-GFP+ motor axons (Figure 3D). Immunocytochemistry demonstrated that also the *Ybx1* protein was localized to motor axons (Figure 3E),

(G) Hb9-eGFP expression reveals that the somatic chamber is not affected by lysis of the axons.

(H) The axonal fractions contain around 5,000 unique transcripts, while MN somas contain >15,000 (mean  $\pm$  SEM).

(I) PCA based on all expressed genes showing “contaminated” axon samples with an intermediate number of detected genes that cluster away from the clean axon samples and toward the somatodendritic samples.

(J) Expression of selected marker genes in soma and axon samples of this study and data from studies by Rotem et al. (2017) and Briese et al. (2016). Our clean axon samples separate from the rest, while axon and soma samples from previously published studies intermingled, indicating cross-contamination.

Scale bars: (A) 500  $\mu$ m. (B) 100  $\mu$ m; scale bar in (B) also applies to (C) and (D). (G) 100  $\mu$ m.

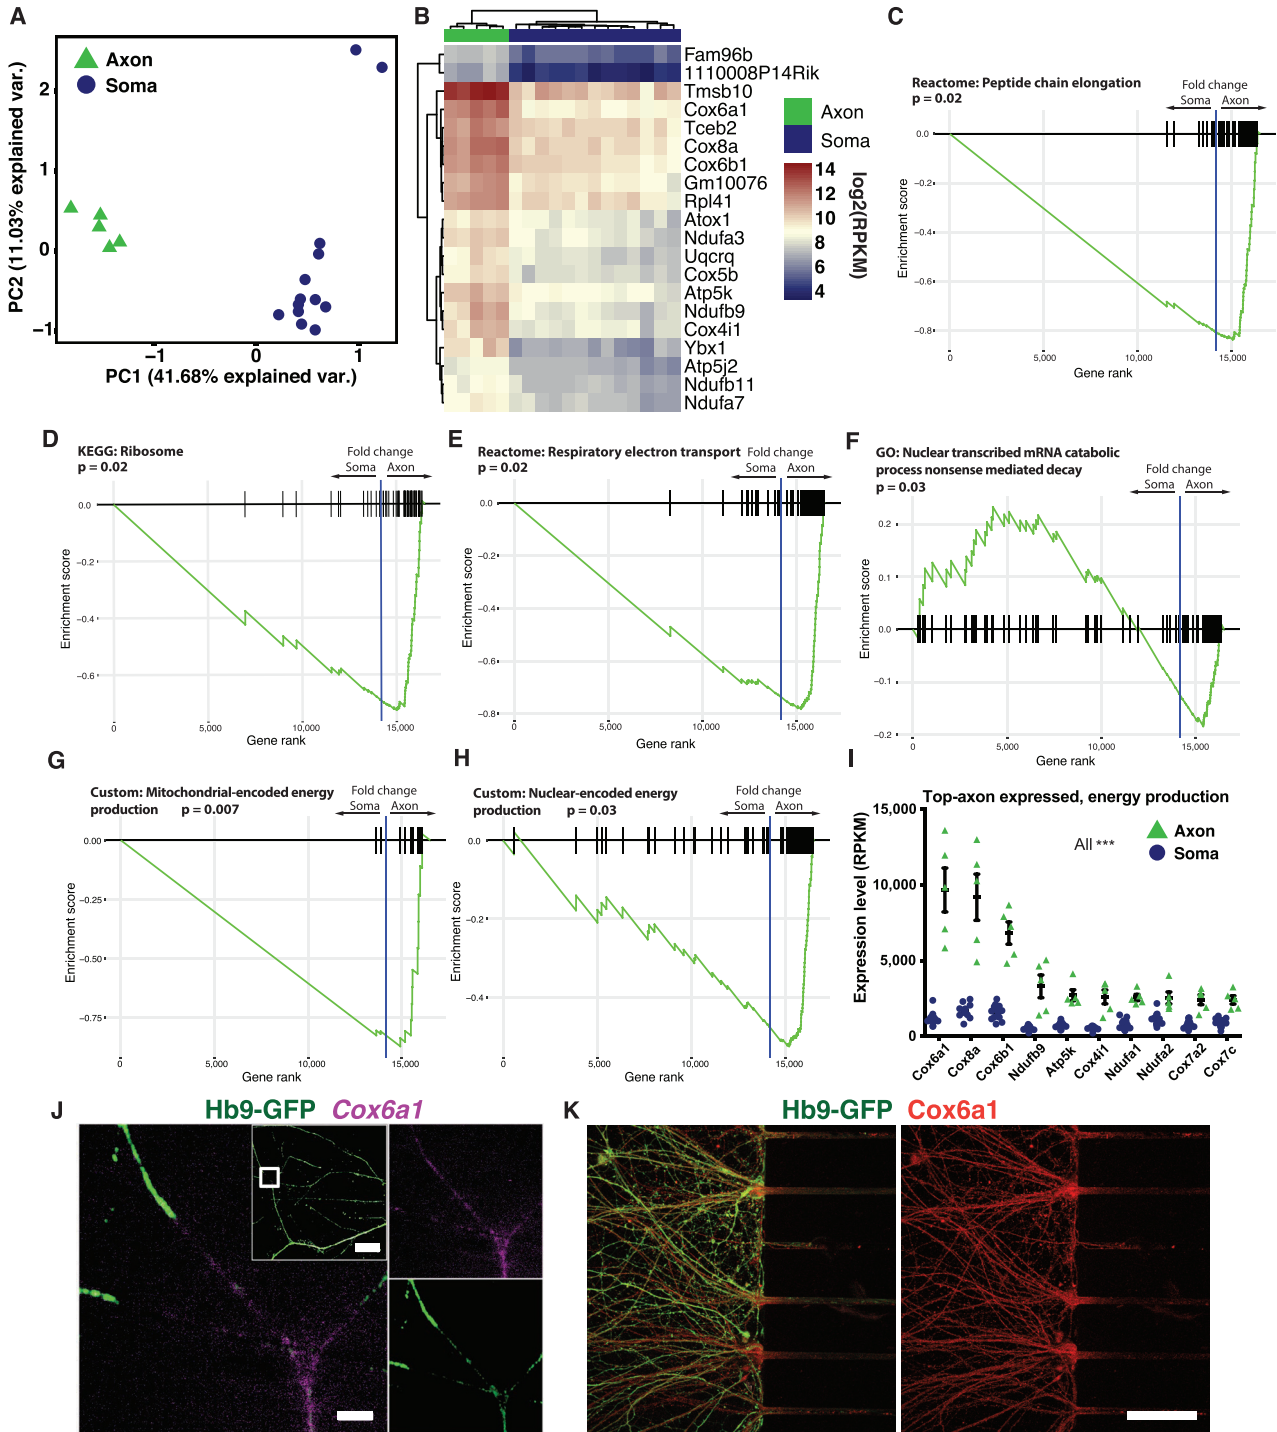

### Figure 2. Axons Have a Transcriptome Distinct from that of Somas

(A) PCA of all expressed genes reveals a clear separation of axons and somas.

(B) Top 20 genes determining PC1-negative loading. All of them are strongly enriched in axons compared with somas.

(C–H) Gene set enrichment analysis (GSEA) using fold changes from the DESeq2 differential expression output ranked list between axons and somas, without a p value cutoff. GSEA uncovers pathways related to (C and D) local translation, (E) energy production, and (F) nonsense-mediated decay. (G and H) Subdividing the oxidative energy production class into (G) mitochondrial- and (H) nuclear-encoded

(legend continued on next page)



strengthening a possible role for Ybx1 in supporting local regulation of distal axonal processes.

In summary, axons show a unique TF profile, reflecting specific functions in this compartment, that could potentially function as communication signals between somas and axons.

### Cross-Comparison of Axonal Datasets across Neuronal Subtypes Reveals Both Motor Neuron-Enriched and Pan-Neuronal Axon mRNA Repertoires

To understand which mRNAs are specific to motor axons versus transcripts defining growing axons in general, we compared our Axon-seq motor axon data with a published axon dataset derived from primary embryonic mouse MNs (Briese et al., 2016), and with primary embryonic mouse dorsal root ganglia (DRG) (Minis et al., 2014). In both comparisons, Gene Ontology (GO) term analysis on the overlapping genes revealed oxidative energy production, translation, and localization of proteins to mitochondria and ribosomes (Figures S3A and S3B, Table S3). Both primary motor axon and primary DRG axon datasets contained a large number of proliferative and glial marker sets that were absent from our Axon-seq data (Figures 1J and S3C). This was further confirmed by GO term analysis of the transcriptomes unique to Briese et al. and Minis et al., which in both cases identified biological processes involved in cell division (Figures S3A and S3B, Table S3).

Notably, *Cox6a1* and *Ybx1*, abundant mRNAs in motor axons, were present across neuron types. Furthermore, a low-expressed, but important transcript, *Nrp1*, was also pan-neuronal (Figures S3A and S3B). We could confirm the presence of this transcript in our motor axons using RNAscope (Figure S3D).

In summary, our analyses have identified a general axonal transcriptional signature and defined a unique motor axon code, which gives clues to function as well as susceptibility to disease.

### Axon-Seq of Human Motor Axons Identifies a Common Transcriptome with Mouse Motor Axons

We further applied Axon-seq to human MNs derived from two control induced pluripotent stem cell (iPSC) lines. Human motor axons could be readily recruited across microgrooves using a BDNF/GDNF gradient (Figure 4A). In a PCA plot, axonal samples clearly separated from hu-

man somatodendritic fractions (Figure 4B). Considering transcripts present in at least three axonal samples, the human motor axonal transcriptome comprised 2,793 genes (Table S4). The number of detected genes was on average  $2,611 \pm 286$  at RPKM >1, and  $3,495 \pm 460$  at RPKM >0.1 (Figure 4C). Human motor axons were strongly enriched for cytoskeletal transcripts such as *NEFL*, *NEFM*, and *GAP43* and showed negligible glial contamination (Figure 4D).

Analysis of the overlap between the human motor axon transcriptome and the common mouse motor axon transcriptome (Figure S3A) identified 1,273 common genes. GO term analysis of these genes revealed energy production, translation, and nonsense-mediated decay as enriched processes (Figure 4E, Table S4).

### The ALS-Causative Mutation *SOD1*<sup>G93A</sup> Modulates the Axonal Transcriptome

Motor axons are early pathological targets in the lethal MN disease ALS, where die-back pathology begins in the distal axon. We therefore investigated if overexpression of an ALS-causative mutation (*SOD1*<sup>G93A</sup>) would induce changes in the axonal transcriptome. MNs derived from mESCs overexpressing human *SOD1*<sup>G93A</sup> have high levels of SOD1 protein in somas and axons (Figure 5A). Axon-seq of *SOD1*<sup>G93A</sup> axons identified  $4,479.5 \pm 1,327.7$  genes at RPKM >1 and  $6,568.8 \pm 2,293.1$  at RPKM >0.1 (Table S5). Human mutant *SOD1* was highly expressed in somas and axons (Figure 5B), 10-fold higher than mouse *Sod1* (Figure 5C). Mutant *SOD1* overexpression resulted in differential expression of 121 genes in axons compared to the control line, of which 96 were upregulated in *SOD1*<sup>G93A</sup> axons, while 25 were reduced (Figure 5D, Table S5). Strikingly, only two of these genes (*Zfand1* and *Zfp688*) were also dysregulated in the *SOD1*<sup>G93A</sup> soma compartment (Table S5). Many of the dysregulated genes were previously implicated in neuronal function and in ALS pathology (Figure 5E). We found that several transcripts paramount for proper axon function were downregulated or completely absent in *SOD1*<sup>G93A</sup> axons, including *Dbn1* (McIntyre et al., 2010; Sharma et al., 2012), *Nrp1* (Telley et al., 2016), and *Mgn1* (Upadhyay et al., 2016). Some transcripts that were upregulated in *SOD1*<sup>G93A</sup> axons appear detrimental, including *Adgr1* (Zuko et al., 2016) (Figure 5E). In addition, upregulation

transcripts reveals an axonal enrichment for both. Differential expression was performed on the five axon samples that passed QC and 13 soma samples, as visualized in (A) and (B).

(I) Expression levels of the highest expressed transcripts in axons related to oxidative energy production. All of the genes plotted are significantly enriched in the axonal compared with the somatodendritic compartment (\*\*\*p < 0.001). p values are derived from the DESeq2 differential expression and are adjusted for multiple testing. Data are represented as mean  $\pm$  SEM.

(J) RNAscope and (K) immunocytochemistry of *Cox6a1*, the most abundant mRNA in axons involved in energy production. Scale bars: (J) 2  $\mu$ m, lower magnification inset, 20  $\mu$ m. (K) 50  $\mu$ m.

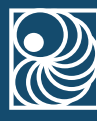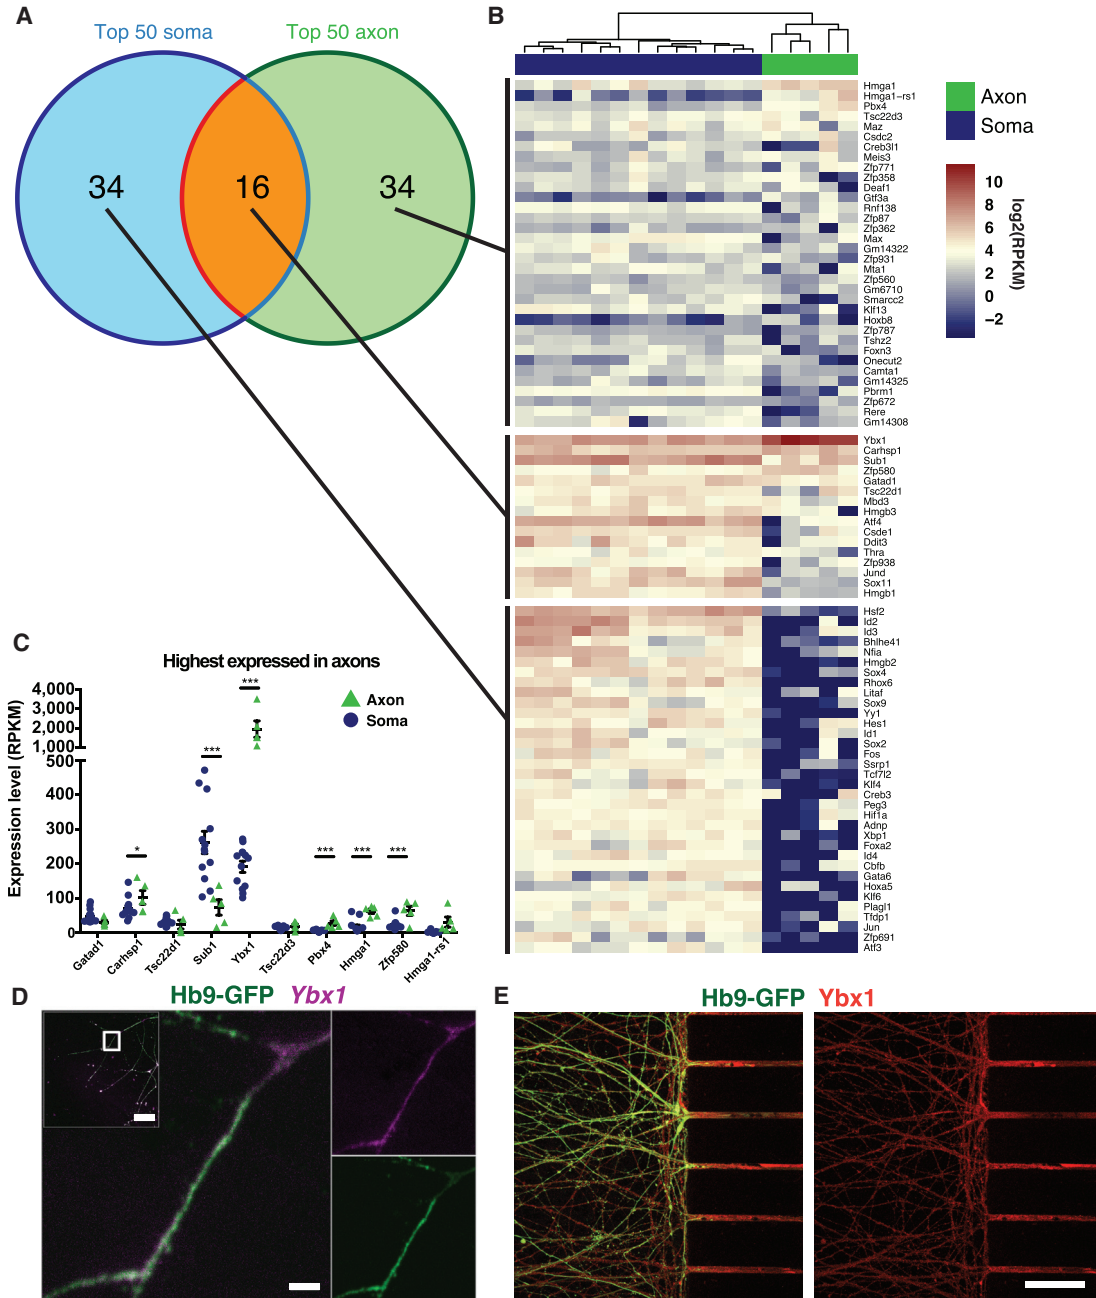

### Figure 3. A Unique Transcription Factor Repertoire Localizes to Axons

(A) Of the top 50 highest expressed TFs in the soma and axon (at least four axonal samples), 16 overlapped.

(B) Heatmap of expression values of TFs from (A).

(C) The top 10 TFs with the highest expression in axons, of which five are significantly enriched in axons, while one is enriched in somas (\* $p < 0.05$ , \*\*\* $p < 0.001$ ).  $p$  values are derived from differential expression between the five axon and the 13 soma samples that passed QC and are corrected for multiple testing (mean  $\pm$  SEM).

(D and E) (D) RNAscope and (E) immunocytochemistry for Ybx1, the most abundant TF at the mRNA level in axons. Scale bars: (D) 2  $\mu$ m, lower magnification inset, 20  $\mu$ m. (E) 50  $\mu$ m.

of some transcripts in ALS could reflect compensatory mechanisms preventing axon damage or dysfunction in SOD1<sup>G93A</sup> axons, including *Dhx36* (Bicker et al., 2013),

the ALS-causative gene *Nek1* (Kenna et al., 2016), *F3* (Biz-zoca et al., 2009), *Rbpms* (Hornberg et al., 2013), and *Farp1* (Zhuang et al., 2009) (Figure 5E).

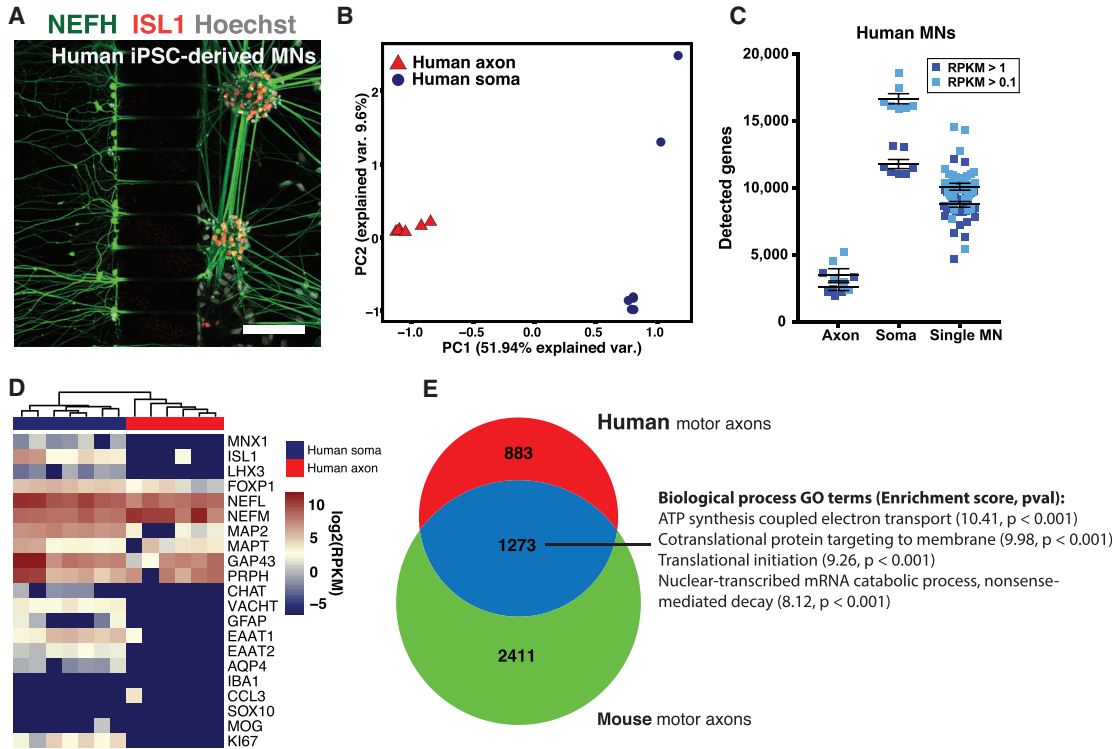

**Figure 4. Human Motor Axons Have a Distinct Transcriptome that Overlaps with Mouse Motor Axons**

(A) Immunocytochemistry of human control iPSC-derived MNs growing in a microfluidic device.  
 (B) PCA based on all expressed genes shows clear separation of human axonal and somatodendritic fractions along PC1.  
 (C) Numbers of detected genes in human bulk somas, axons, and single human Hb9-GFP+ MNs. Human axons contain >3,400 transcripts, while somas contain >15,000 transcripts at RPKM >0.1. Single cells are intermediate with approximately 10,000 transcripts detected. Data are represented as means  $\pm$  SEM.  
 (D) Expression of selected marker genes in human soma and axon samples reveals strong axonal presence of mRNAs for cytoskeletal elements and the TF *FOXP1*. Glial markers are absent in axons.  
 (E) Comparison of the human motor axon transcriptome with the common mouse motor axon transcriptome (Figure S3A) reveals an overlap of 1,273 genes (after exclusion of non-orthologous genes). These genes enrich in GO terms for energy production, translation, and nonsense-mediated decay. Scale bar: (A) 100  $\mu$ m.

Finally, we wanted to elucidate if any of the transcripts that were dysregulated by the *SOD1*<sup>G93A</sup> mutation were affected across MN diseases. We therefore compared our RNA sequencing data with a microarray dataset on motor axons in which the *Smn* gene was knocked down to model the disease spinal muscular atrophy (SMA) (Saal et al., 2014). Sixteen transcripts were regulated across the two disease models. However, 15 genes were regulated in the opposite direction in the ALS and SMA disease models, while one transcript, the axon guidance receptor Neuropilin 1 (*Nrp1*), was downregulated in both MN disease models (Figure 5F).

In summary, application of Axon-seq methodology to a mutant *SOD1* overexpression model of ALS identified axonal dysregulation of 121 transcripts, some of which appear detrimental, while others may indicate compensatory mechanisms to counteract any induced dysfunction.

*Nrp1* was downregulated in motor axons across ALS and SMA disease models and might have implications for pathology.

## DISCUSSION

Axonal RNA biology is increasingly implicated in ALS. We developed Axon-seq, an improved method for studying the transcriptome of axons. With careful bioinformatic QC, this cost-effective and sensitive method can reliably yield high-quality and pure axonal transcriptomes. Axon-seq was successfully applied to mouse and human MNs from multiple pluripotent sources, cultured in microfluidic devices. We detected 3,500–5,000 mRNA transcripts in axons, which were enriched for mitochondrial energy production and ribosomes, reflecting a high



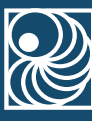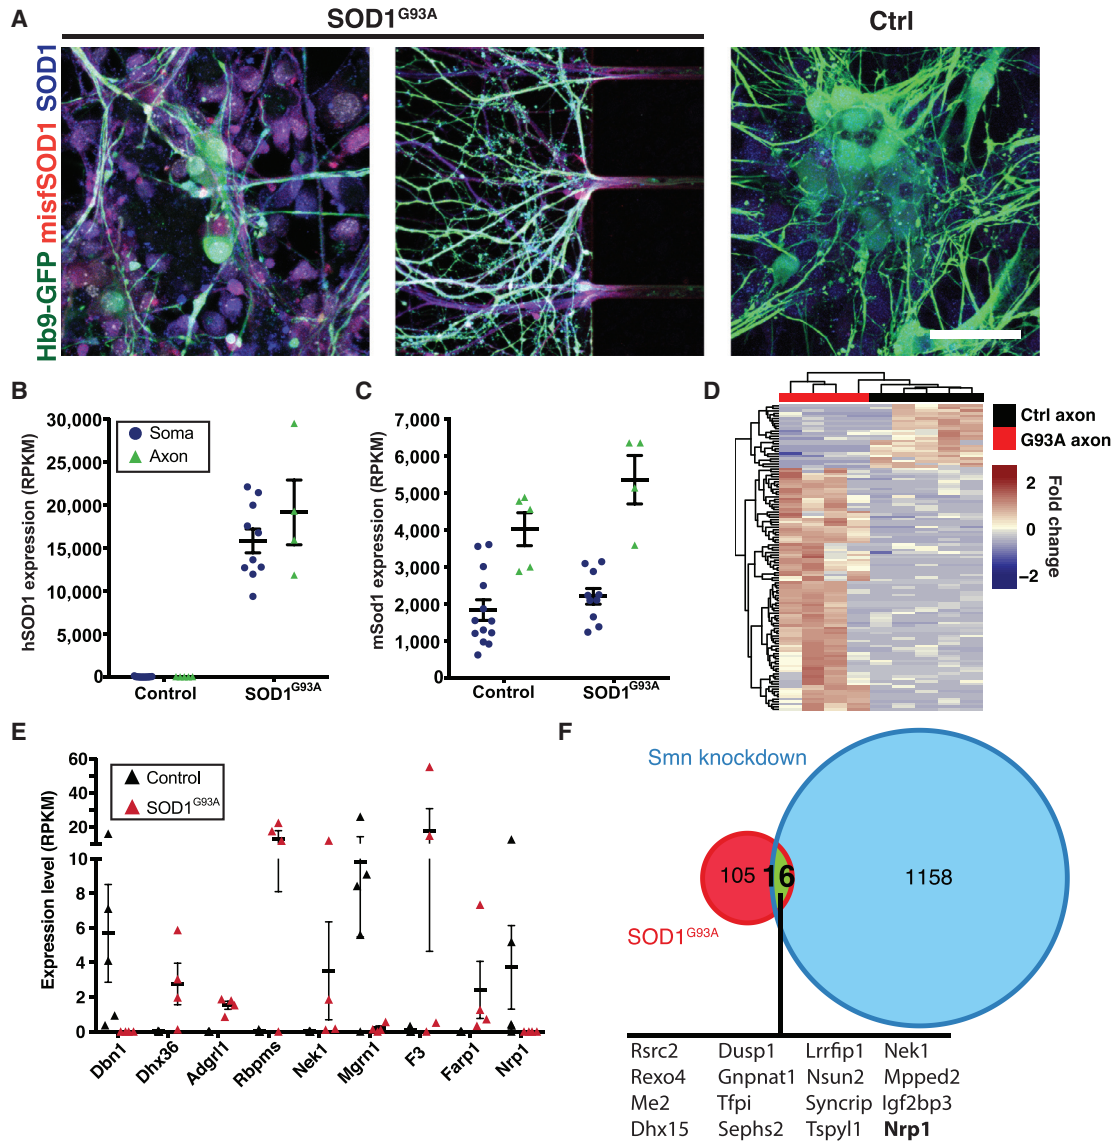

### Figure 5. Overexpression of SOD1<sup>G93A</sup> Induces Changes in the Axonal Transcriptome

(A) Staining for SOD1 and misfolded SOD1 in MN cultures. In SOD1<sup>G93A</sup>-expressing cells high levels of both SOD1 and misSOD1 are detected, whereas no misSOD1 is detected in control cells.

(B and C) (C) Mouse *Sod1* is enriched in axons, while (B) transgenic human *SOD1* is equally divided over both compartments. Levels of *hSOD1* are approximately 10-fold higher in somas than those of mouse *Sod1*. Data are represented as means ± SEM.

(D) Heatmap of differentially expressed genes between five control axon samples and four axon samples from SOD1<sup>G93A</sup>-overexpressing MNs. A total of 121 genes are differentially expressed, of which 25 are enriched in control axons and 96 in SOD1<sup>G93A</sup> axons.

(E) Selected differentially expressed genes from the analysis visualized in (D) with relevance to ALS and general neuronal functioning (all *p* < 0.05). All *p* values are derived from the DESeq2 output and are corrected for multiple testing (mean ± SEM).

(F) Overlap between dysregulated genes upon SOD1<sup>G93A</sup> expression in our dataset and *Smn* knockdown in data from Saal et al. (2014). Sixteen genes are commonly dysregulated. One gene, *Nrp1*, is commonly downregulated.

Scale bar: (A) 50 μm.

energy dependence of growing axons and the importance of local protein translation. Indeed, protein synthesis in chick sympathetic axons accounts for 5% of total cellular protein synthesis (Lee and Hollenbeck, 2003). Transcripts

for all essential subunits of the proteasome system (*Psm1–7* and *Psm1–7*) were present in motor axons (Table S2). Many regulatory subunits and chaperones were also detected, implying extensive regulation of protein



degradation in axons. Given that small amounts of RNA can be translated into multiple protein copies, maintaining an mRNA pool poised for translation in neuronal processes saves energy and increases capacity for a rapid response.

The two largest mRNA groups identified in axons through GO term analysis and GSEA were mitochondrially encoded mRNAs involved in energy production and mitochondria. As mitochondria are abundant in axons, and assuming no bias in soma to axon transport of mitochondrially encoded RNAs, we speculate that these mRNAs are locally transcribed. This is consistent with our finding that nuclear-encoded mRNAs for energy production (in particular nuclear-encoded ribosomal RNAs) were less abundant in axons compared with mitochondrially encoded genes and in agreement with previous reports describing a predominance of mitochondrially encoded genes in DRG axons (Minis et al., 2014). Mitochondria can replicate by fission in axons (Amiri and Hollenbeck, 2008), which would be facilitated by local translation of mitochondrially encoded proteins. In fact, our data suggest that the complete mRNA library required for mitochondrial replicative fission and function is present in axons.

TFs define neuronal identity in early development and are later often needed for survival (Kadkhodaei et al., 2013; Sgado et al., 2006). Some TFs were recently shown to function outside the soma and to be important in neuronal circuitry plasticity, axon pathfinding, and neuroprotection (Sugiyama et al., 2008; Torero Ibad et al., 2011; Wizenmann et al., 2009). Multiple studies identified axonal mRNAs for TFs, in addition to nuclear transport machinery and the nuclear envelope, whose local translation and subsequent signaling to the soma appear vital to axon maintenance and survival in injury paradigms (Ben-Yaakov et al., 2012; Cox et al., 2008; Hanz et al., 2003; Ji and Jaffrey, 2012; Yoon et al., 2012). We detected a specific set of TF mRNAs enriched in distal motor axons compared with somas, including the RNA-binding factor *Ybx1*. YBX1 has roles in binding and stabilizing cytoplasmic mRNAs. It also regulates translation by affecting the interaction between eukaryotic initiation factors and mRNAs (Lyabin et al., 2014b). YBX1 can also mediate anterograde axonal transport of *Cox4* mRNA, encoding a mitochondrial protein (Kar et al., 2017). In this function YBX1 interacts with FUS, an RNA binding protein and known ALS-causing gene (Groen et al., 2013). We expect that YBX1 and other axonally located TFs will emerge as important mediators of communication between somas and axons.

Dying-back pathology in vulnerable MNs implies that the distal axonal compartment undergoes early pathological changes in ALS. Axon-seq on motor axons harboring the ALS-causative mutation SOD1<sup>G93A</sup> uncovered differential expression of 121 mRNAs, several of which are crucial for neuronal function, axon maintenance, and

growth. For example, a number of the transcripts that were upregulated in SOD1<sup>G93A</sup> axons appear detrimental, including *Adgr1*, which can induce apoptosis and cause reduction in neurite outgrowth (Zuko et al., 2016). Multiple transcripts that are important for axon function were downregulated or absent in SOD1<sup>G93A</sup> axons, including *Dbn1*, which is important for axon initiation, growth, and guidance (McIntyre et al., 2010; Sharma et al., 2012); *Nrp1*, a semaphorin receptor involved in both axon guidance and subcellular target recognition (Telley et al., 2016); and *Mgm1*, a ubiquitin ligase, which appears important for mitochondrial function and neuronal survival (Upadhyay et al., 2016). *Mgm1* is downregulated in SOD1 mice and is recruited to SOD1-positive inclusions (Chhangani et al., 2016). *Nrp1* acts as an axonal attractant during development (Chauvet et al., 2007) and is important for limb innervation (Huettl et al., 2011). The downregulation of *Nrp1* in our study appears to align with a loss of NMJ function. Nonetheless, it was recently shown that intraperitoneal delivery of an anti-Nrp1 antibody to SOD1<sup>G93A</sup> mice could lengthen their lifespan and reduce NMJ denervation (Venkova et al., 2014). Although it is not evident if downregulation of *Nrp1* within MNs induced the rescue in the Venkova et al. study, this could mean that the downregulation we see may be a beneficial compensatory event, but this remains to be further investigated.

*Nrp1* was downregulated in motor axons across SMA and ALS disease models. While SMA is generally an early-onset MN disease and ALS is a disease correlated with aging, both are characterized by early motor axon pathology (Cifuentes-Diaz et al., 2002; Comley et al., 2016; Fischer et al., 2004). Our data combined with published studies indicate that NRP1 might be an early target in ALS pathology and that it potentially could be modulated in both diseases with beneficial results.

Interestingly, the SOD1 mutation caused an upregulation of transcripts that could be beneficial to axons, possibly through compensatory mechanisms aimed at preventing axon damage or dysfunction. These transcripts with potential beneficial properties included *Dhx36*, an ATP-dependent helicase, which mediates dendritic localization of miR-134, affecting synaptic protein synthesis and plasticity (Bicker et al., 2013); *F3*, a cell adhesion molecule involved in neurite outgrowth (Bizzoca et al., 2009); *Rbpms*, an RNA-binding protein with importance for RNA-granule localization and dendritic tree complexity (Hornberg et al., 2013); *Farp1*, a marker for LMC MNs that positively regulates dendrite growth (Zhuang et al., 2009); and *Nek1*, which has a putative role in microtubule stability, neuronal morphology, and axon polarity. Interestingly, loss-of-function variants of *NEK1* confer susceptibility to ALS in humans (Kenna et al., 2016).

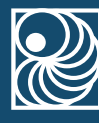

In summary, we have developed Axon-seq, a refined method with high sensitivity for RNA sequencing of axons, which contains crucial bioinformatic QC steps to identify high-quality axonal transcriptomes. We demonstrate that mouse and human motor axons contain a smaller and distinct transcriptome compared to somas, with high enrichment for transcripts required for local energy production and protein translation. We also show that the majority of motor axonal genes are shared with axons of other neuronal types, emphasizing their importance in general axonal biology. Finally, motor axons expressing ALS-causative SOD1<sup>G93A</sup> displayed both down- and up-regulation of key transcripts involved in axonal growth and guidance, as well as neuronal survival.

Due to its robustness, sensitivity, and cost effectiveness, Axon-seq is a method of broad utility for the study of RNA dynamics in any polarized cell. Here we successfully applied Axon-seq to human motor axons, demonstrating its usefulness for the study of human neuronal processes in stem cell-derived *in vitro* systems. Thus far, axons of human stem cell-derived glutamatergic neurons have been isolated in microfluidic devices and screened using microarrays (Bigler et al., 2017), but not using more advanced RNA-seq methods. Microfluidic devices have also been used to investigate axonal trafficking deficits and axonal degeneration in ALS patient stem cell-derived MNs (Naumann et al., 2018). Here, Axon-seq can provide an additional layer of transcriptome data, facilitating identification of networks underlying pathological changes in human motor axons. In our system, we studied growing axons prior to formation of NMJs. Stage-specific changes in the axonal mRNA repertoire were recently identified in growing, pruning, and mature axons in mouse retinal ganglion cells (Shigeoka et al., 2016). It is expected that also the motor axon transcriptome is influenced by the formation and maturity of the NMJ. Axon-seq could be applied to a microfluidic system containing iPSC-derived MNs and muscle to investigate such processes in the context of the human NMJ and its instability in ALS.

## EXPERIMENTAL PROCEDURES

### Culturing of Mouse Motor Neurons in Microfluidic Devices

Microfluidic devices (SND150, Xona Microfluidics) were attached to sterilized cover glasses (28 mm diameter, Menzel Gläser) by drying them extensively and applying gentle force to seal them onto the glass coverslips. Both compartments were coated overnight with 15  $\mu\text{g}/\text{mL}$  poly-L-ornithine (Sigma-Aldrich). The secondary coating consisted of a mix of 2  $\mu\text{g}/\text{mL}$  fibronectin (Sigma-Aldrich) and 10  $\mu\text{g}/\text{mL}$  laminin (Sigma-Aldrich).

MNs were resuspended at 100,000 cells/ $\mu\text{L}$  and loaded into the microchannel in a 5  $\mu\text{L}$  droplet. At this point, neural differen-

tiation medium was supplemented with 10 ng/mL GDNF, BDNF, ciliary neurotrophic factor, and neurotrophin-3; 200  $\mu\text{M}$  ascorbic acid (Sigma-Aldrich); 100 nM retinoic acid (RA); and 2  $\mu\text{M}$  5-fluoro-2'-deoxyuridine (Sigma-Aldrich). Cells were allowed at least 30 min to attach, after which medium was added into the adjacent wells. The axonal compartment was filled with similar medium but containing 50 ng/mL GDNF and BDNF to facilitate axonal recruitment. Volumes in the wells were adapted to ensure flow across chambers to gradually provide medium and to establish a flow and thus trophic factor gradient from the axonal to the somatic compartment. Media in the devices was changed daily.

Axonal recruitment was halted after 2 days. The concentrations of GDNF and BDNF in the axonal compartment were reduced to 5 ng/mL. In the soma compartment, trophic factor concentrations were doubled from this point onward, to 20 ng/mL. Additionally, RA was no longer included in the media.

### Culturing of Human Motor Neurons in Microfluidic Devices

The use of human stem cell lines was approved by the regional ethical review board in Stockholm, Sweden (Regionala Etikprövningsnämnden (EPN), Stockholm). For human MNs, devices with 450  $\mu\text{m}$  grooves were used (SND450, Xona Microfluidics). The procedures were largely similar to those for culturing mouse MNs in microfluidic devices, with the following exceptions. Human MNs were plated at a lower density of 30,000 cells/ $\mu\text{L}$  (150,000 cells/device). After dissociation, cells were plated in devices in B27 medium supplemented with 5  $\mu\text{M}$  Rock inhibitor, 200  $\mu\text{M}$  ascorbic acid, and 10  $\mu\text{M}$  DAPT. BDNF and GDNF (10 ng/mL) were added to the somatodendritic compartment, while 50 ng/mL BDNF and GDNF were added to the axonal compartment for recruitment of motor axons. After 3 days in the devices, DAPT was removed from the medium. BDNF and GDNF levels were reduced to 10 ng/mL in the axonal compartment.

### Harvesting, Library Preparation, and Sequencing

Cultures were harvested after 1 week (mouse) or 2 weeks (human) in the microfluidic devices using 2% Triton X-100 (in water) and 1.5 U of RNase inhibitor (TaKaRa). Lysis solution (75  $\mu\text{L}$ ) was flushed through the compartments, collected, and snap-frozen on dry ice. Prior to library preparation, the volume of axonal samples was reduced from 75 to 15  $\mu\text{L}$  using a concentrator (Eppendorf), and 10  $\mu\text{L}$  of the lysate was used for reverse transcription. Five microliters of the lysates from somatodendritic samples was directly used for the reverse transcription reaction, carried out in a final volume of 10  $\mu\text{L}$ . Further steps were carried out as described (Nichterwitz et al., 2016) and samples sequenced on Illumina HiSeq2000 and 2500 platforms.

### RNA-Seq Data Processing and Analysis

Sequencing reads were mapped to the mm10 (mouse) and the hg38 (human) reference genome with HISAT version 2.0.3 (Kim et al., 2015). Aligned reads were extracted and assigned using the GenomicAlignments package (version 1.8.4, Lawrence et al., 2013) in R, with the function summarizeOverlaps, mode set to "union." QC exclusion criteria were <300,000 (axons) or <500,000 (somas) uniquely mapped reads, Spearman correlation



to other samples <0.4 or <2,500 genes expressed at RPKM >0.1. To ensure that high-quality axonal samples were not biologically cross-contaminated with material from cell somas, during the cell seeding process or the lysis, we conducted Spearman correlation, unsupervised hierarchical clustering, and PCA of all samples that passed the initial QC. Axonal samples that clustered with soma samples in these analyses were removed. For the control Hb9-GFP mESC line, MN soma samples (n = 13) and axon samples (n = 8) were derived from a total of six independent experiments. For the SOD1<sup>G93A</sup>-overexpressing mESC line, MN soma samples (n = 10) and axon samples (n = 4) were derived from a total of six independent experiments. Human MN soma samples (n = 7) and axon samples (n = 6) were derived from two iPSC lines. The human single MN analysis was based on n = 39.

### ACCESSION NUMBERS

The original RNA sequencing data from this study is available at the NCBI Gene Expression Omnibus under accession number GEO: GSE121069.

### SUPPLEMENTAL INFORMATION

Supplemental Information includes Supplemental Experimental Procedures, three figures, and five tables and can be found with this article online at <https://doi.org/10.1016/j.stemcr.2018.11.005>.

### AUTHOR CONTRIBUTIONS

E.H. conceived the project. J.N., J.A.B., and E.H. designed the experiments. J.N., J.A.B., and R.H. acquired data. J.N., J.A.B., R.H., N.K., and E.H. analyzed data. E.H. supervised the project. J.N. and E.H. wrote the manuscript with the help of J.A.B. and N.K. All authors edited and gave critical input on the manuscript.

### ACKNOWLEDGMENTS

We would like to thank Mattias Karlen for his excellent work in creating the schematic for Figure 1. This work was supported by grants from the Swedish Research Council (2016-02112), EU Joint Programme for Neurodegenerative Disease (JPND) (529-2014-7500), the Strategic Research Programme in Neuroscience (StratNeuro), the Karolinska Institutet, Birgit Backmark's Donation to ALS Research at Karolinska Institutet in memory of Nils and Hans Backmark, Åhlén-stiftelsen (mA1/h16, mA1/h17), Ulla-Carin Lindquists stiftelse för ALS forskning, and Magnus Bergvalls Stiftelse (2015-00783, 2016-01531) to E.H. J.A.B. is supported by a postdoctoral fellowship from the Swedish Society for Medical Research (SSMF) and N.K. is supported by a postdoctoral fellowship from the Swedish Brain Foundation. Funding for open access charge: Swedish Research Council (2016-02112) to E.H.

Received: May 15, 2018

Revised: November 6, 2018

Accepted: November 6, 2018

Published: December 11, 2018

### REFERENCES

- Amiri, M., and Hollenbeck, P.J. (2008). Mitochondrial biogenesis in the axons of vertebrate peripheral neurons. *Dev. Neurobiol.* **68**, 1348–1361.
- Ben-Yaakov, K., Dagan, S.Y., Segal-Ruder, Y., Shalem, O., Vuppalan-chi, D., Willis, D.E., Yudin, D., Rishal, I., Rother, F., Bader, M., et al. (2012). Axonal transcription factors signal retrogradely in lesioned peripheral nerve. *EMBO J.* **31**, 1350–1363.
- Bicker, S., Khudayberdiev, S., Weiss, K., Zocher, K., Baumeister, S., and Schratt, G. (2013). The DEAH-box helicase DHX36 mediates dendritic localization of the neuronal precursor-microRNA-134. *Genes Dev.* **27**, 991–996.
- Bigler, R.L., Kamande, J.W., Dumitru, R., Niedringhaus, M., and Taylor, A.M. (2017). Messenger RNAs localized to distal projections of human stem cell derived neurons. *Sci. Rep.* **7**, 611.
- Bizzoca, A., Corsi, P., and Gennarini, G. (2009). The mouse F3/contactin glycoprotein: structural features, functional properties and developmental significance of its regulated expression. *Cell Adh. Migr.* **3**, 53–63.
- Boyden, S. (1962). The chemotactic effect of mixtures of antibody and antigen on polymorphonuclear leucocytes. *J. Exp. Med.* **115**, 453–466.
- Briese, M., Saal, L., Appenzeller, S., Moradi, M., Baluapuri, A., and Sendtner, M. (2016). Whole transcriptome profiling reveals the RNA content of motor axons. *Nucleic Acids Res.* **44**, e33.
- Campanot, R.B. (1977). Local control of neurite development by nerve growth factor. *Proc. Natl. Acad. Sci. U S A* **74**, 4516–4519.
- Chauvet, S., Cohen, S., Yoshida, Y., Fekrane, L., Livet, J., Gayet, O., Segu, L., Buhot, M.C., Jessell, T.M., Henderson, C.E., et al. (2007). Gating of Sema3E/PlexinD1 signaling by neuropilin-1 switches axonal repulsion to attraction during brain development. *Neuron* **56**, 807–822.
- Chhangani, D., Endo, F., Amanullah, A., Upadhyay, A., Watanabe, S., Mishra, R., Yamanaka, K., and Mishra, A. (2016). Mahogunin ring finger 1 confers cytoprotection against mutant SOD1 aggregates and is defective in an ALS mouse model. *Neurobiol. Dis.* **86**, 16–28.
- Cifuentes-Diaz, C., Nicole, S., Velasco, M.E., Borra-Cebrian, C., Panozzo, C., Frugier, T., Millet, G., Roblot, N., Joshi, V., and Melki, J. (2002). Neurofilament accumulation at the motor endplate and lack of axonal sprouting in a spinal muscular atrophy mouse model. *Hum. Mol. Genet.* **11**, 1439–1447.
- Comley, L.H., Nijssen, J., Frost-Nylen, J., and Hedlund, E. (2016). Cross-disease comparison of amyotrophic lateral sclerosis and spinal muscular atrophy reveals conservation of selective vulnerability but differential neuromuscular junction pathology. *J. Comp. Neurol.* **524**, 1424–1442.
- Cox, L.J., Hengst, U., Gurskaya, N.G., Lukyanov, K.A., and Jaffrey, S.R. (2008). Intra-axonal translation and retrograde trafficking of CREB promotes neuronal survival. *Nat. Cell Biol.* **10**, 149–159.
- Dasen, J.S., De Camilli, A., Wang, B., Tucker, P.W., and Jessell, T.M. (2008). Hox repertoires for motor neuron diversity and connectivity gated by a single accessory factor, FoxP1. *Cell* **134**, 304–316.

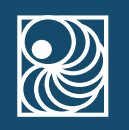

- DeJesus-Hernandez, M., Mackenzie, I.R., Boeve, B.F., Boxer, A.L., Baker, M., Rutherford, N.J., Nicholson, A.M., Finch, N.A., Flynn, H., and Adamson, J. (2011). Expanded GGGGCC hexanucleotide repeat in noncoding region of C9ORF72 causes chromosome 9p-linked FTD and ALS. *Neuron* 72, 245–256.
- Fischer, L.R., Culver, D.G., Tennant, P., Davis, A.A., Wang, M., Castellano-Sanchez, A., Khan, J., Polak, M.A., and Glass, J.D. (2004). Amyotrophic lateral sclerosis is a distal axonopathy: evidence in mice and man. *Exp. Neurol.* 185, 232–240.
- Garner, C.C., Tucker, R.P., and Matus, A. (1988). Selective localization of messenger RNA for cytoskeletal protein MAP2 in dendrites. *Nature* 336, 674–677.
- Groen, E.J., Fumoto, K., Blokhuis, A.M., Engelen-Lee, J., Zhou, Y., van den Heuvel, D.M., Koppers, M., van Diggelen, F., van Heest, J., Demmers, J.A., et al. (2013). ALS-associated mutations in FUS disrupt the axonal distribution and function of SMN. *Hum. Mol. Genet.* 22, 3690–3704.
- Hanz, S., Perlson, E., Willis, D., Zheng, J.Q., Massarwa, R., Huerta, J.J., Koltzenburg, M., Kohler, M., van-Minnen, J., Twiss, J.L., et al. (2003). Axoplasmic importins enable retrograde injury signaling in lesioned nerve. *Neuron* 40, 1095–1104.
- Holt, C.E., and Schuman, E.M. (2013). The central dogma decentralized: new perspectives on RNA function and local translation in neurons. *Neuron* 80, 648–657.
- Hornberg, H., Wollerton-van Horck, F., Maurus, D., Zwart, M., Svoboda, H., Harris, W.A., and Holt, C.E. (2013). RNA-binding protein Hermes/RBPMS inversely affects synapse density and axon arbor formation in retinal ganglion cells in vivo. *J. Neurosci.* 33, 10384–10395.
- Huettl, R.E., Soellner, H., Bianchi, E., Novitch, B.G., and Huber, A.B. (2011). Npn-1 contributes to axon-axon interactions that differentially control sensory and motor innervation of the limb. *PLoS Biol.* 9, e1001020.
- Ji, S.J., and Jaffrey, S.R. (2012). Intra-axonal translation of SMAD1/5/8 mediates retrograde regulation of trigeminal ganglia subtype specification. *Neuron* 74, 95–107.
- Kadkhodaei, B., Alvarsson, A., Schintu, N., Ramskold, D., Volakakis, N., Joodmardi, E., Yoshitake, T., Kehr, J., Decressac, M., Bjorklund, A., et al. (2013). Transcription factor Nurr1 maintains fiber integrity and nuclear-encoded mitochondrial gene expression in dopamine neurons. *Proc. Natl. Acad. Sci. U S A* 110, 2360–2365.
- Kar, A.N., Vargas, J.N.S., Chen, C.Y., Kowalak, J.A., Gioio, A.E., and Kaplan, B.B. (2017). Molecular determinants of cytochrome C oxidase IV mRNA axonal trafficking. *Mol. Cell. Neurosci.* 80, 32–43.
- Kenna, K.P., van Doornaal, P.T., Dekker, A.M., Ticozzi, N., Kenna, B.J., Diekstra, F.P., van Rheenen, W., van Eijk, K.R., Jones, A.R., Keagle, P., et al. (2016). NEK1 variants confer susceptibility to amyotrophic lateral sclerosis. *Nat. Genet.* 48, 1037–1042.
- Kim, D., Langmead, B., and Salzberg, S.L. (2015). HISAT: a fast spliced aligner with low memory requirements. *Nat. Methods* 12, 357–360.
- Kwiatkowski, T.J., Bosco, D., Leclerc, A., Tamrazian, E., Vanderburg, C., Russ, C., Davis, A., Gilchrist, J., Kasarskis, E., and Munsat, T. (2009). Mutations in the FUS/TLS gene on chromosome 16 cause familial amyotrophic lateral sclerosis. *Science* 323, 1205–1208.
- Lasek, R.J., Garner, J.A., and Brady, S.T. (1984). Axonal transport of the cytoplasmic matrix. *J. Cell Biol.* 99, 212s–221s.
- Lawrence, M., Huber, W., Pages, H., Aboyoun, P., Carlson, M., Gentleman, R., Morgan, M.T., and Carey, V.J. (2013). Software for computing and annotating genomic ranges. *PLoS Comput. Biol.* 9, e1003118.
- Lee, S.K., and Hollenbeck, P.J. (2003). Organization and translation of mRNA in sympathetic axons. *J. Cell Sci.* 116, 4467–4478.
- Litman, P., Barg, J., Rindzoonski, L., and Ginzburg, I. (1993). Subcellular localization of tau mRNA in differentiating neuronal cell culture: implications for neuronal polarity. *Neuron* 10, 627–638.
- Lyabin, D.N., Doronin, A.N., Eliseeva, I.A., Guens, G.P., Kulakovskiy, I.V., and Ovchinnikov, L.P. (2014a). Alternative forms of Y-box binding protein 1 and YB-1 mRNA. *PLoS One* 9, e104513.
- Lyabin, D.N., Eliseeva, I.A., and Ovchinnikov, L.P. (2014b). YB-1 protein: functions and regulation. *Wiley Interdiscip. Rev. RNA* 5, 95–110.
- McIntyre, J.C., Titlow, W.B., and McClintock, T.S. (2010). Axon growth and guidance genes identify nascent, immature, and mature olfactory sensory neurons. *J. Neurosci. Res.* 88, 3243–3256.
- Mills, R., Taylor-Weiner, H., Correia, J.C., Agudelo, L.Z., Allodi, I., Kolonelou, C., Martinez-Redondo, V., Ferreira, D.M.S., Nichterwitz, S., Comley, L.H., et al. (2018). Neurturin is a PGC-1alpha1-controlled myokine that promotes motor neuron recruitment and neuromuscular junction formation. *Mol. Metab.* 7, 12–22.
- Minis, A., Dahary, D., Manor, O., Leshkowitz, D., Pilpel, Y., and Yaron, A. (2014). Subcellular transcriptomics—dissection of the mRNA composition in the axonal compartment of sensory neurons. *Dev. Neurobiol.* 74, 365–381.
- Naumann, M., Pal, A., Goswami, A., Lojewski, X., Japtok, J., Vehlow, A., Naujock, M., Gunther, R., Jin, M., Stanslowsky, N., et al. (2018). Impaired DNA damage response signaling by FUS-NLS mutations leads to neurodegeneration and FUS aggregate formation. *Nat. Commun.* 9, 335.
- Nichterwitz, S., Chen, G., Aguila Benitez, J., Yilmaz, M., Storvall, H., Cao, M., Sandberg, R., Deng, Q., and Hedlund, E. (2016). Laser capture microscopy coupled with Smart-seq2 for precise spatial transcriptomic profiling. *Nat. Commun.* 7, 12139.
- Picelli, S., Bjorklund, A.K., Faridani, O.R., Sagasser, S., Winberg, G., and Sandberg, R. (2013). Smart-seq2 for sensitive full-length transcriptome profiling in single cells. *Nat. Methods* 10, 1096–1098.
- Rosen, D.R., Siddique, T., Patterson, D., Figlewicz, D.A., Sapp, P., Hentati, A., Donaldson, D., Goto, J., O'Regan, J.P., and Deng, H.-X. (1993). Mutations in Cu/Zn superoxide dismutase gene are associated with familial amyotrophic lateral sclerosis. *Nature* 362, 59–62.
- Rotem, N., Magen, I., Ionescu, A., Gershoni-Emek, N., Altman, T., Costa, C.J., Gradus, T., Pasmanik-Chor, M., Willis, D.E., Ben-Dov, I.Z., et al. (2017). ALS along the axons—expression of coding and noncoding RNA differs in axons of ALS models. *Sci. Rep.* 7, 44500.
- Saal, L., Briese, M., Kneitz, S., Glinka, M., and Sendtner, M. (2014). Subcellular transcriptome alterations in a cell culture model of

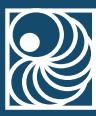

- spinal muscular atrophy point to widespread defects in axonal growth and presynaptic differentiation. *RNA* 20, 1789–1802.
- Sgado, P., Alberi, L., Gherbassi, D., Galasso, S.L., Ramakers, G.M., Alavian, K.N., Smidt, M.P., Dyck, R.H., and Simon, H.H. (2006). Slow progressive degeneration of nigral dopaminergic neurons in postnatal *Engrailed* mutant mice. *Proc. Natl. Acad. Sci. U S A* 103, 15242–15247.
- Sharma, S., Grintsevich, E.E., Hsueh, C., Reisler, E., and Gimzewski, J.K. (2012). Molecular cooperativity of drebrin1-300 binding and structural remodeling of F-actin. *Biophys. J.* 103, 275–283.
- Shigeoka, T., Jung, H., Jung, J., Turner-Bridger, B., Ohk, J., Lin, J.Q., Amieux, P.S., and Holt, C.E. (2016). Dynamic axonal translation in developing and mature visual circuits. *Cell* 166, 181–192.
- Sreedharan, J., Blair, I.P., Tripathi, V.B., Hu, X., Vance, C., Rogelj, B., Ackerley, S., Durnall, J.C., Williams, K.L., and Buratti, E. (2008). TDP-43 mutations in familial and sporadic amyotrophic lateral sclerosis. *Science* 319, 1668–1672.
- Sugiyama, S., Di Nardo, A.A., Aizawa, S., Matsuo, I., Volovitch, M., Prochiantz, A., and Hensch, T.K. (2008). Experience-dependent transfer of *Otx2* homeoprotein into the visual cortex activates postnatal plasticity. *Cell* 134, 508–520.
- Swinnen, B., and Robberecht, W. (2014). The phenotypic variability of amyotrophic lateral sclerosis. *Nat. Rev. Neurol.* 10, 661–670.
- Taylor, A.M., Blurton-Jones, M., Rhee, S.W., Cribbs, D.H., Cotman, C.W., and Jeon, N.L. (2005). A microfluidic culture platform for CNS axonal injury, regeneration and transport. *Nat. Methods* 2, 599–605.
- Telley, L., Cadilhac, C., Cioni, J.M., Saywell, V., Jahannault-Talignani, C., Huettl, R.E., Sarrailh-Faivre, C., Dayer, A., Huber, A.B., and Ango, F. (2016). Dual function of NRP1 in axon guidance and subcellular target recognition in cerebellum. *Neuron* 91, 1276–1291.
- Torero Ibad, R., Rhee, J., Mrejen, S., Forster, V., Picaud, S., Prochiantz, A., and Moya, K.L. (2011). *Otx2* promotes the survival of damaged adult retinal ganglion cells and protects against excitotoxic loss of visual acuity in vivo. *J. Neurosci.* 31, 5495–5503.
- Upadhyay, A., Amanullah, A., Chhangani, D., Mishra, R., Prasad, A., and Mishra, A. (2016). Mahogunin ring finger-1 (MGRN1), a multifaceted ubiquitin ligase: recent unraveling of neurobiological mechanisms. *Mol. Neurobiol.* 53, 4484–4496.
- Vance, C., Rogelj, B., Hortobágyi, T., De Vos, K.J., Nishimura, A.L., Sreedharan, J., Hu, X., Smith, B., Ruddy, D., and Wright, P. (2009). Mutations in *FUS*, an RNA processing protein, cause familial amyotrophic lateral sclerosis type 6. *Science* 323, 1208–1211.
- Venkova, K., Christov, A., Kamaluddin, Z., Kobalka, P., Siddiqui, S., and Hensley, K. (2014). Semaphorin 3A signaling through neuropilin-1 is an early trigger for distal axonopathy in the SOD1G93A mouse model of amyotrophic lateral sclerosis. *J. Neuropathol. Exp. Neurol.* 73, 702–713.
- Wichterle, H., Lieberam, I., Porter, J.A., and Jessell, T.M. (2002). Directed differentiation of embryonic stem cells into motor neurons. *Cell* 110, 385–397.
- Wizenmann, A., Brunet, I., Lam, J., Sonnier, L., Beurdeley, M., Zarbalis, K., Weisenhorn-Vogt, D., Weinl, C., Dwivedy, A., Joliot, A., et al. (2009). Extracellular *Engrailed* participates in the topographic guidance of retinal axons in vivo. *Neuron* 64, 355–366.
- Yoon, B.C., Jung, H., Dwivedy, A., O'Hare, C.M., Zivraj, K.H., and Holt, C.E. (2012). Local translation of extranuclear lamin B promotes axon maintenance. *Cell* 148, 752–764.
- Zhang, Y., Chen, K., Sloan, S.A., Bennett, M.L., Scholze, A.R., O'Keefe, S., Phatnani, H.P., Guarnieri, P., Caneda, C., Ruderisch, N., et al. (2014). An RNA-sequencing transcriptome and splicing database of glia, neurons, and vascular cells of the cerebral cortex. *J. Neurosci.* 34, 11929–11947.
- Zhuang, B., Su, Y.S., and Sockanathan, S. (2009). FARP1 promotes the dendritic growth of spinal motor neuron subtypes through transmembrane Semaphorin6A and PlexinA4 signaling. *Neuron* 61, 359–372.
- Zuko, A., Oguro-Ando, A., Post, H., Taggenbrock, R.L., van Dijk, R.E., Altelaar, A.F., Heck, A.J., Petrenko, A.G., van der Zwaag, B., Shimoda, Y., et al. (2016). Association of cell adhesion molecules contactin-6 and Latrophilin-1 regulates neuronal apoptosis. *Front. Mol. Neurosci.* 9, 143.

**Stem Cell Reports, Volume 11**

**Supplemental Information**

**Axon-Seq Decodes the Motor Axon Transcriptome and Its Modulation  
in Response to ALS**

**Jik Nijssen, Julio Aguila, Rein Hoogstraaten, Nigel Kee, and Eva Hedlund**

## SUPPLEMENTAL INFORMATION

### Axon-seq decodes the motor axon transcriptome and its modulation in response to ALS

Jik Nijssen<sup>1,3</sup>, Julio Aguila<sup>1,3</sup>, Rein Hoogstraaten<sup>1,2</sup>, Nigel Kee<sup>1</sup> and Eva Hedlund<sup>1\*</sup>

<sup>1</sup> Department of Neuroscience, Karolinska Institutet, Stockholm, 171 77, Sweden

<sup>2</sup> Department of Translational Neuroscience, Brain Center Rudolf Magnus, UMC Utrecht, 3984 CG Utrecht, Netherlands, <sup>3</sup> Co-first authors, \* Corresponding author

**Supplemental Figure S1. Characterization of motor neuron cultures and quality control of axonal samples.** (A) Expression of Hox transcription factors, as well as *Isl1*, *Foxp1* and *Phox2b* in the somatodendritic bulk samples and in single selected Hb9::eGFP+ motor neurons. (B) Red-channel images from immunostainings from Fig. 1C and D show clear enrichment for Tau+ neurites, but not Map2+ neurites in the axonal compartment, implying an enrichment for axons. (C) Hoechst-negative axonal swellings occur at the groove exits in the axonal compartment. (D) Expression of selected marker genes in soma and axon samples, compared with single selected Hb9::eGFP motor neurons and sequencing data of purified glial cell types derived from Zhang *et al.* 2014. (E) cDNA yield of axonal samples compared with somatodendritic bulk samples and single cell samples revealed that axonal samples contained a similar amount of cDNA after library preparation as single cell sequencing libraries. Data is represented as mean  $\pm$  SEM. (F) Number of detected genes in axon and soma samples, as well as single isolated motor neurons. Even though axons have similar levels of cDNA yield after library preparation, they have a lower number of detected genes compared to single motor neurons. Data is represented as mean  $\pm$  SEM. (G) Heatmap of 200 differentially expressed genes, the top 100 enriched in soma and the top 100 enriched in axon by p-value. (H) Heatmap of all transcripts that were not detected in axons, but present at an average of  $> 1$  RPKMs in somas ( $n = 2,903$  genes). Scale bar: B: 50  $\mu$ m.

**Supplemental Figure S2. Validation of controls for RNAscope and somatic RNAscope for Ybx1 and Cox6a1.** (A) The negative control RNAscope probe against a bacterial gene showed no signal. (B) The positive control probes for three housekeeping genes showed positive signals. (C) A poly-A probe revealed all poly-adenylated RNAs. RNAscope of (D) *Ybx1* and (E) *Cox6a1* demonstrated their presence in somas and axons of Hb9::GFP motor neurons. Scale bars: A: 20  $\mu$ m. B: 20  $\mu$ m. C: 10  $\mu$ m, higher magnification inset: 15  $\mu$ m. D: 20  $\mu$ m, higher magnification inset: 5  $\mu$ m (*Ybx1*), 2  $\mu$ m (*Cox6a1*).

**Supplemental Figure S3. Cross comparison with primary mouse motor axon and DRG axon datasets.** (A) Cross comparison of the Axon-seq data with the primary motor axon dataset from Briese *et al.* (2016) (B) and the primary DRG axon dataset from Minis *et al.* (2014) revealed that a majority of the transcripts identified with Axon-seq overlapped with the other data sets. (A,B) GO terms enriched across data set included oxidative energy production and local translation. Both primary datasets contained non-overlapping genes that enriched for GO-terms related to cell division, implying possible contamination with cell somas of dividing cells. (C) Expression of selected marker genes in the dataset from Minis *et al.* (2014) revealed enrichment for neurofilaments, but also the presence of glial markers



in both soma and axonal compartments. **(D)** Lowly expressed, but biologically important, transcripts in axons e.g. *Nrp 1*, can be detected using RNAscope. Scale bars: **D**: 10  $\mu\text{m}$ , higher magnification inset: 15  $\mu\text{m}$ .

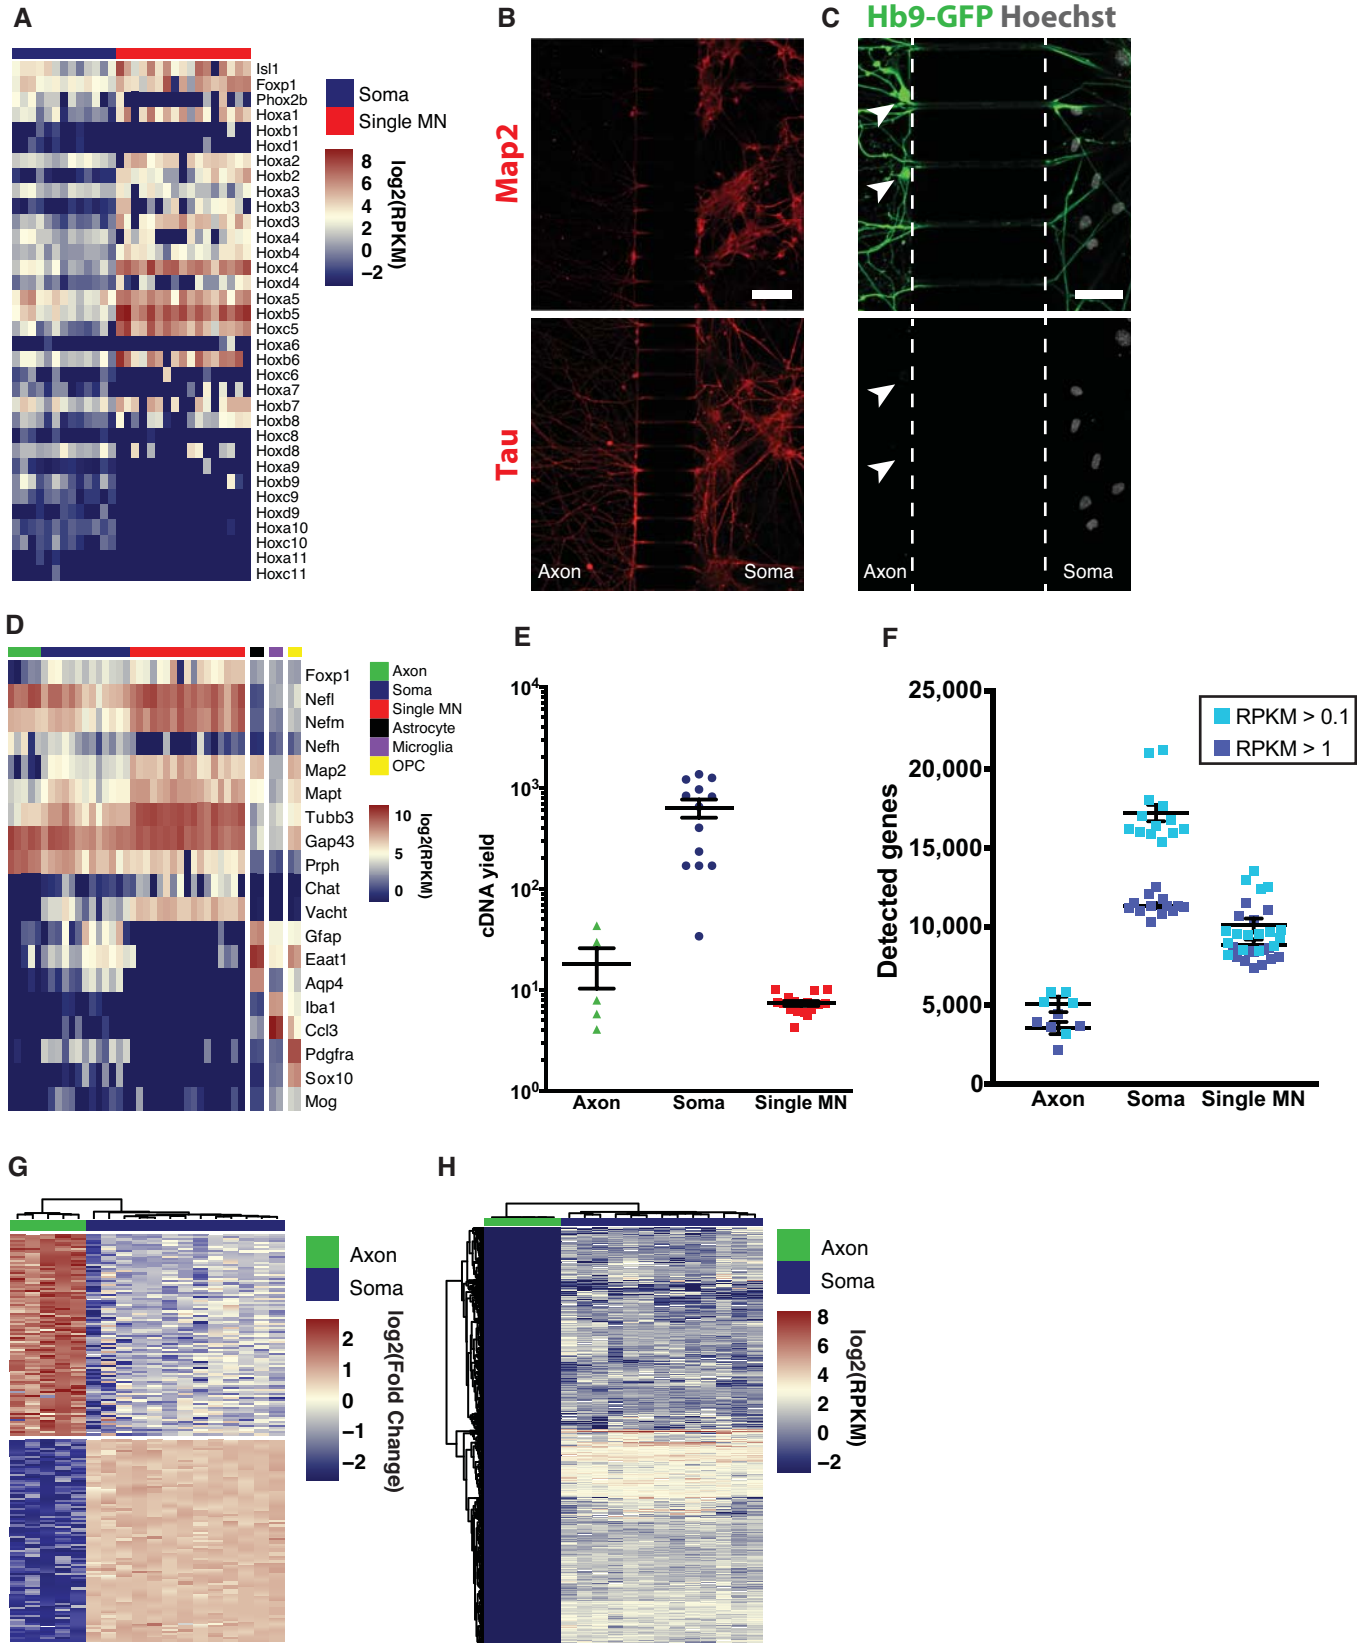

Supplemental Figure S1

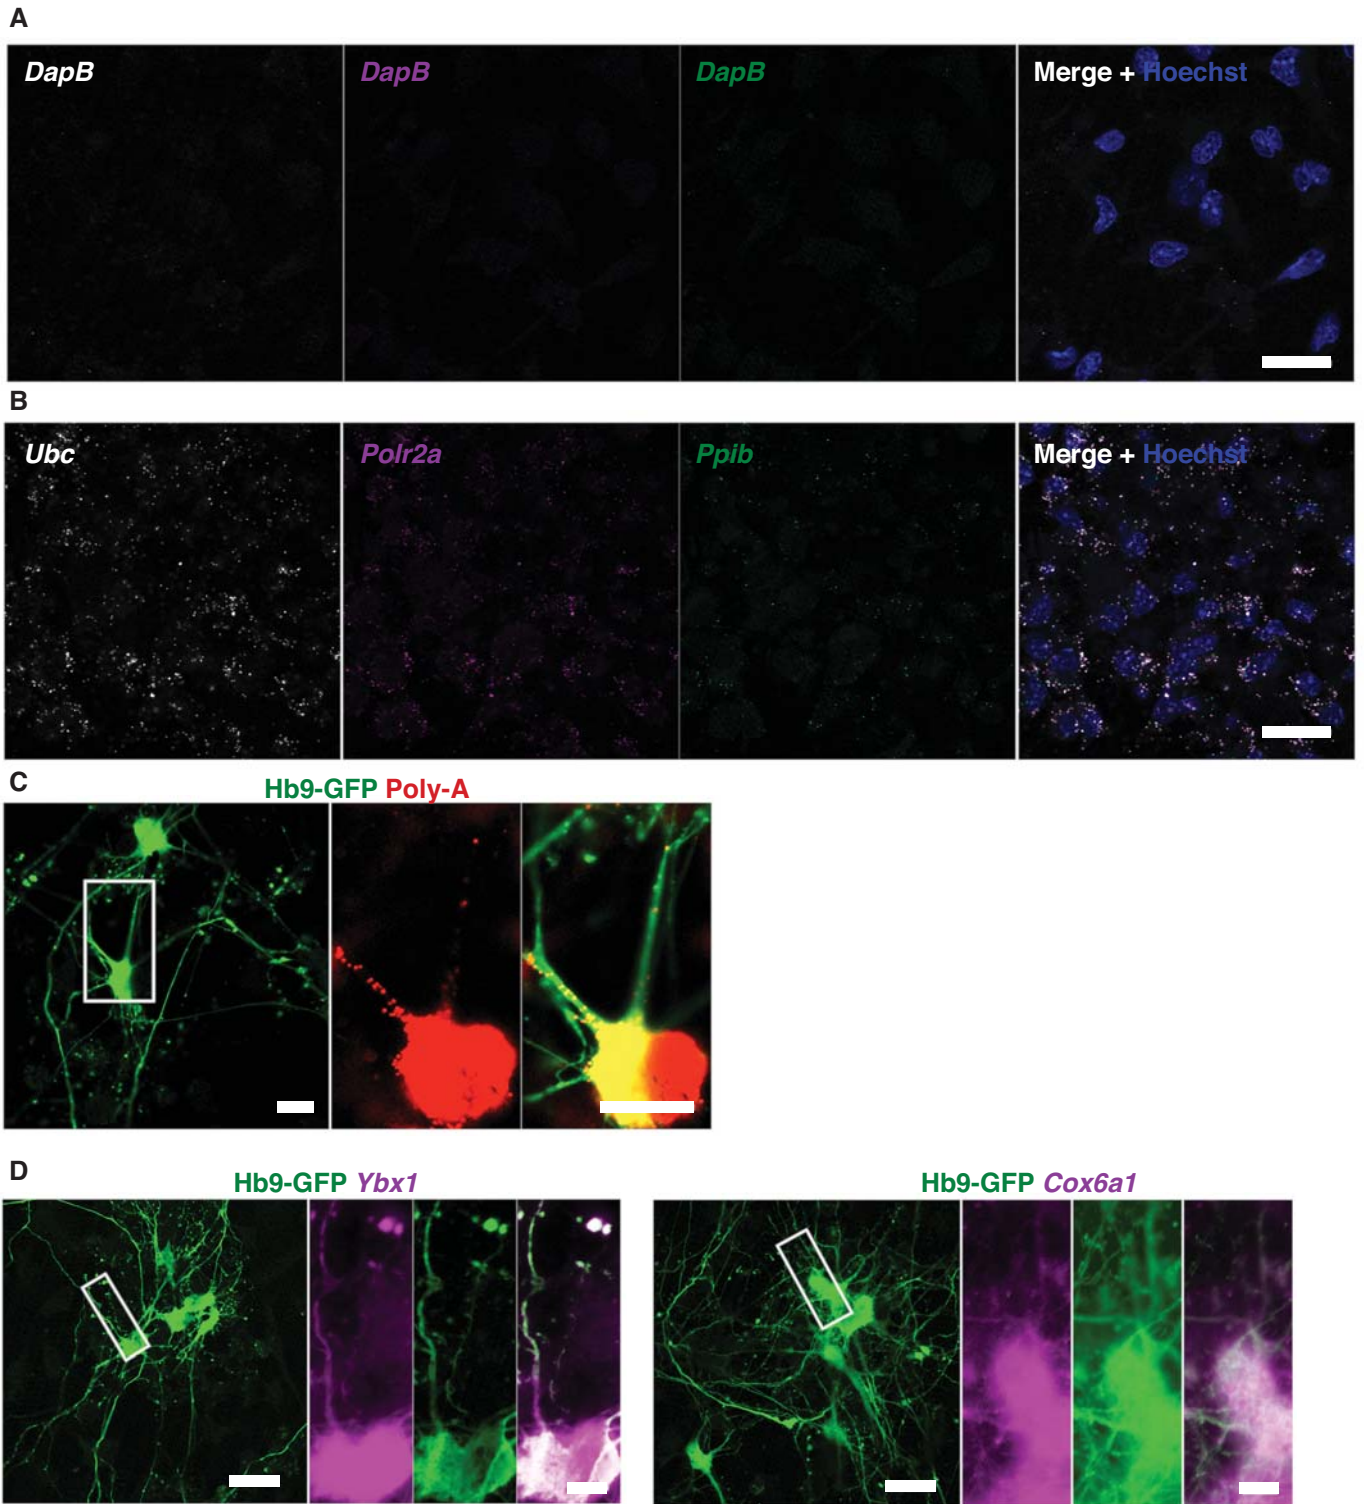

Supplemental Figure S2

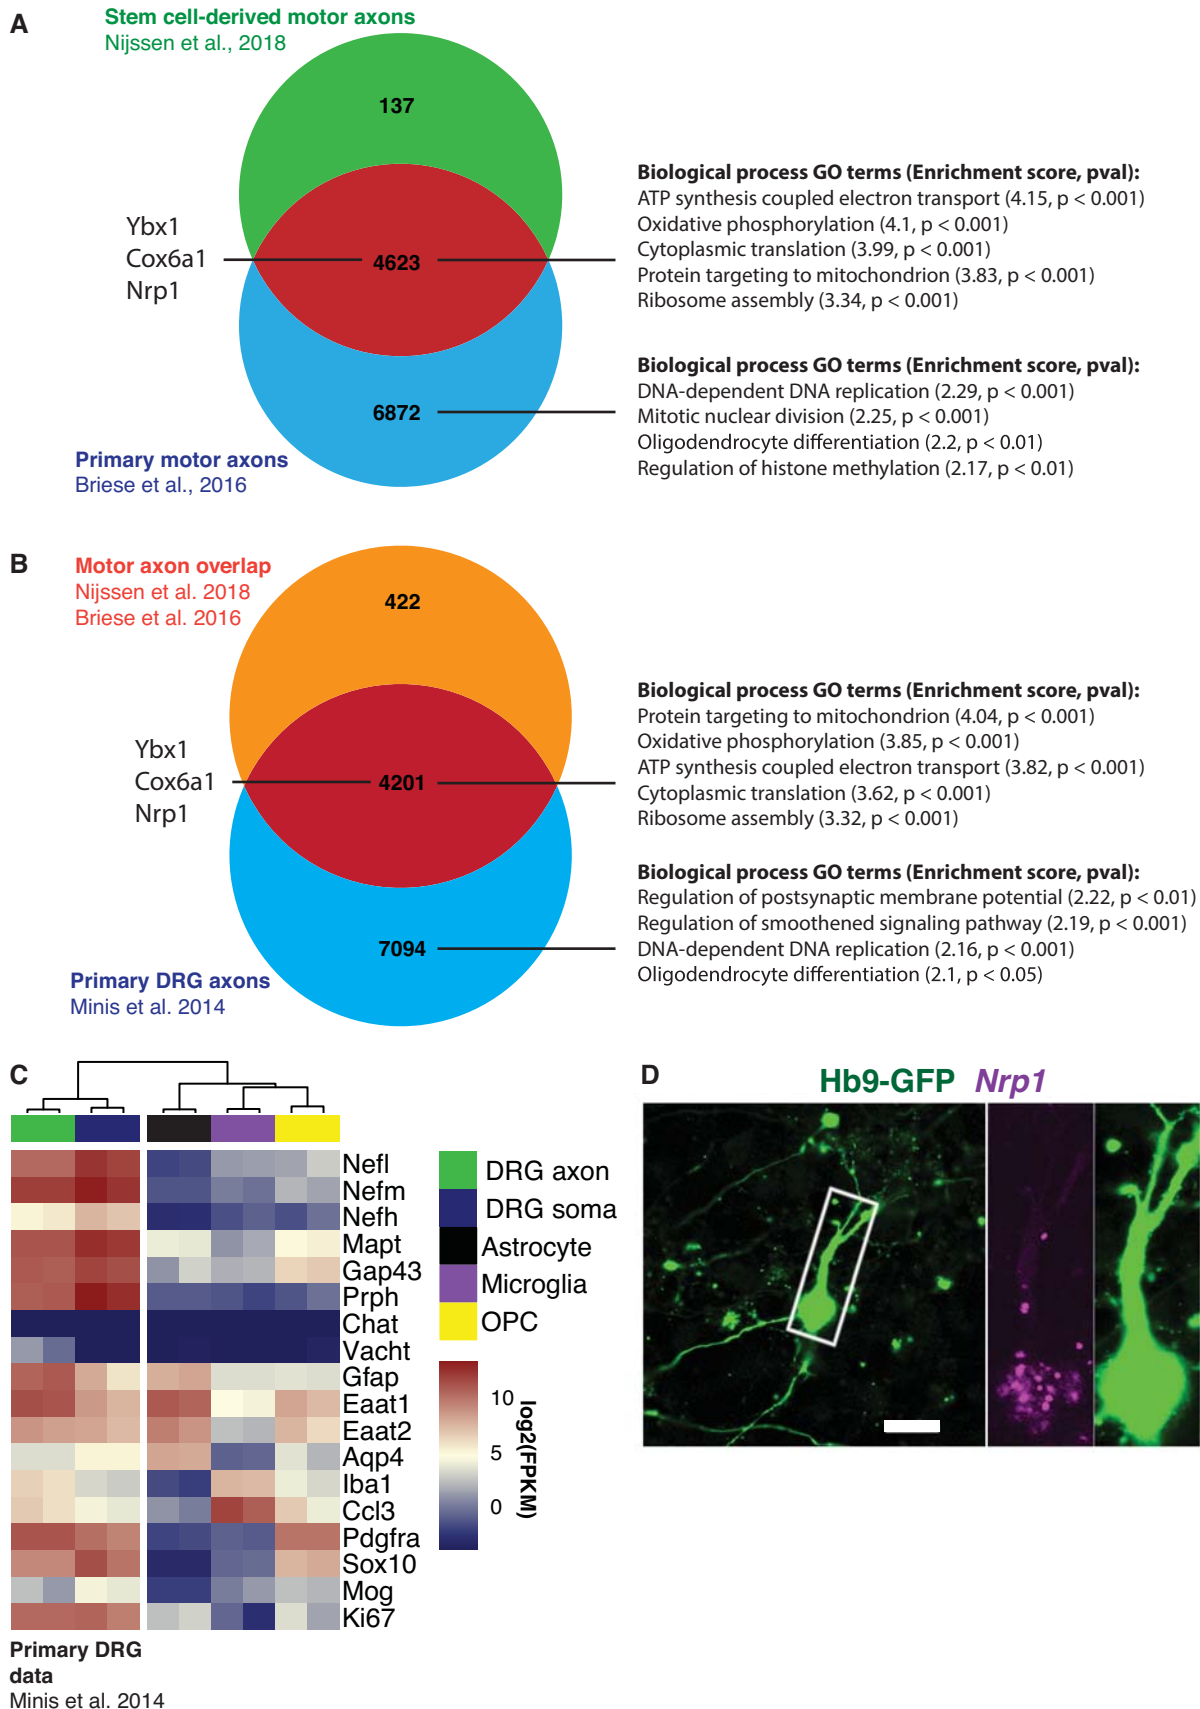

Supplemental Figure S3

## **Supplemental Experimental Methods**

### **Mouse embryonic stem cell lines**

We used two mouse embryonic stem cell (mESC) lines that express GFP under the Hb9 promoter. One of the lines overexpressed human *SOD1*<sup>G93A</sup> (passage 12), while the other line expressed only the Hb9::GFP reporter (passage 14). Both lines were derived from Hb9::GFP/*SOD1*<sup>G93A</sup> mice and generously provided by Dr. Sebastian Thams (Thams et al., 2018).

### **Differentiation of mouse embryonic stem cells into motor neurons**

mESCs were expanded on tissue culture dishes coated with 0.1% gelatin (Sigma-Aldrich) in ES media for two days: Knock-Out DMEM with 15% Knock-Out serum, 2mM L-glutamine, 100nM non-essential amino acids, 100 U/ml each of penicillin and streptomycin, 80nM  $\beta$ -mercaptoethanol (all Thermo Fisher) and 10<sup>6</sup> U/ml leukaemia inhibitory factor (LIF, Merck-Millipore). Then, mESCs were dissociated with TrypLE Express (Thermo Fisher) and purified for 30 minutes on gelatin-coated plates. Embryoid body formation was conducted for 2 days by culturing mESCs in suspension (4x10<sup>5</sup> cells/ml media) in neural differentiation media: 1:1 mix of Neurobasal and DMEM/F12 (Thermo Fisher) supplemented with 1x B27 (Thermo Fisher) 2mM L-glutamine, 100nM  $\beta$ -mercaptoethanol and 100 U/mL each of penicillin and streptomycin. During the initial day of embryoid body formation the media was kept in constant swirling motion at 30 rpm to ensure that uniformly sized spheres were formed. Embryoid bodies were subsequently patterned by the addition of 500nM smoothed agonist (SAG, R&D) and 100nM retinoic acid (RA, Sigma-Aldrich) to the neural differentiation media for four days (Nichterwitz et al., 2016). Embryoid bodies containing motor neurons were dissociated for 20 minutes using TrypLE Express (Thermo Fisher), filtered through a 40  $\mu$ m cell strainer (Fisher Scientific) and spun down for 5 minutes at 1,200 rpm for cell plating into the microfluidic devices.

### **Human induced pluripotent stem cell lines**

Two control human iPSC lines were used for motor neuron differentiations in microfluidic devices. One iPSC line was purchased from WiCell (DF6-9-9T.B, passage 17). The second iPSC line (39b-corrected, passage 25) was generously provided by Prof. Kevin Eggan (Kiskinis et al., 2014). A third human embryonic stem cell line expressing GFP under the murine Hb9 promoter was used for isolating single GFP+ motor neurons. This line was generously provided by Prof. Kevin Eggan (Di Giorgio et al., 2008).

### **Differentiation of human pluripotent stem cells into motor neurons**

Human embryonic stem cells and induced pluripotent stem cells were maintained on Matrigel-coated culture dishes (Corning) and passaged with 5  $\mu$ M Rock-inhibitor (Y-27632; Tocris). For differentiation into motor neurons, the protocol reported in (Guo et al., 2017) was used with minor adaptations. Briefly, cells were dissociated with TrypLE Express and resuspended as single cells in N2/B27 media to form embryoid bodies (DMEM-F12 supplemented with N2 in a 1:1 ratio with Neurobasal media supplemented with B27, all Thermo Fisher). For the first two days, this media was further supplemented with 5  $\mu$ M Rock-inhibitor, 40  $\mu$ M SB-431542, 200 nM LDN-193189 and 3  $\mu$ M CHIR99021 (all Tocris) and 200  $\mu$ M ascorbic acid (Sigma-Aldrich). As of the third day, the media was supplemented with 100 nM RA, 500 nM SAG and 200  $\mu$ M ascorbic acid. On day ten, the EBs were dissociated for plating into microfluidic devices.

### **Immunocytochemistry**

For immunocytochemistry cells were fixed in the devices with 4% PFA for 20 min. All subsequent immunocytochemistry procedures and imaging were performed on intact devices.

After fixation, cells were permeabilized with 0.1% triton X-100 and blocked with 10% donkey serum. Primary antibody incubation was performed overnight at 4°C, and secondary antibody incubation for 1h at RT. A full list of primary antibodies is provided in Supplemental Table 1. Secondary antibodies were conjugated with Alexa Fluor 488, 568 and 647. Nuclei were counterstained with Hoechst 33258. Imaging was performed on a Zeiss LSM800 confocal microscope at the Biomedicum Imaging Core Facility, Karolinska Institutet.

### **RNAscope on mouse motor neurons**

RNAscope (Wang et al., 2012) was used to verify the expression of Cox6a1 and Ybx1 based on the sequencing data. In brief, neural progenitors or motor neuron cultures, grown on glass coverslips or in microfluidic devices, were fixed with fresh PFA (4% in PBS) for 30min at 4°C. The RNAscope multiplex fluorescent kit v1 was used (Cat. No. 320850) according to the manufacturer's recommendations. To evaluate the procedure in neural progenitor and motor neurons cultures we tested the triple negative (Cat. 320871) and positive control probes (Polr2a-C1, Ppib-C2 and Ubc-C3) provided with the fluorescent kit in addition to a probe targeting poly-A tails of mRNAs (Cat. 318631-C2, 1 to 100 dilution). To easily visualize motor neurons, we combined the RNAscope procedure with immunofluorescence. After the hybridization with the last probe (Amp 4-FL) samples were washed and stained with an anti-GFP antibody.

Cells in microfluidic devices were stained with Cox6a1 (Cat. 519781-C2), Ybx1 (548711-C1) or Nrp1 (471621-C1) probes and the anti-GFP antibody. Representative images were taken with a Zeiss LSM800 confocal microscope at the Biomedicum Imaging Core Facility, Karolinska Institutet.

### **Motor axon quantification**

The Fiji distribution of ImageJ (Schindelin et al., 2012) was used to analyze the areas of axonal GFP and MAPT (Tau) immunofluorescence. A ratio based on the respective areas was calculated and used for quantification. A total of five images, from three microfluidic devices, were quantified.

### **Extended cDNA library preparation**

To prevent RNA degradation all procedures were carried out as rapidly as possible, and work surfaces and equipment were cleaned with RNaseZAP (AM9788M, Thermofisher) or DNAoff (9036, Takara). For all experiments, reagents were of molecular biology/PCR grade if available. Only tubes that were certified nuclease-free were used. Cell preparations harvested from the microfluidic devices were quickly thawed, vortexed and spun down. The volumes of axonal samples were always measured and 1µl of RNase inhibitor was added before reducing the volumes from approximately 75µl to 12-15µl using a concentrator (5301, Eppendorf) set to aqueous solution mode at room temperature. For reverse transcription (RT) of axonal samples, 10µl of the lysates were used after concentration and the volumes of the reactions scaled-up accordingly (2X) to a final volume of approximately 20µl. Only 5µl of the lysates from somatodendritic preparations were directly used for the RT reactions, which were carried out in a final volume of 10 µl. Further library preparation of cell culture samples as well as human motor neurons for Illumina sequencing was carried out using the Smart-Seq2 protocol (Picelli et al., 2013) with some previously described modifications (Nichterwitz et al., 2016).

### **Extended RNA-seq data processing and analysis**

Samples were sequenced on the Illumina HiSeq2000 or HiSeq2500 platforms, generating reads of 43 and 51bp, respectively. For mouse cell culture samples, reads were mapped to the mm10 mouse reference genome and the human SOD1 gene locus (hg38/GRCh38) with HISAT version 2.0.3 (Kim et al., 2015), using publicly available infrastructure from the main Galaxy server, available at [www.usegalaxy.org](http://www.usegalaxy.org). Aligned reads were then extracted and assigned using the GenomicAlignments package (version 1.8.4, (Lawrence et al., 2013)) in R, with the function

summarizeOverlaps, mode set to 'union'. Normalized RPKM values were calculated using gene exon lengths from mm10 Ensembl version GRCm38.87 for mouse. For human samples, the hg38 reference genome was used for alignment. Quality control was performed on all samples and the exclusion criteria were: < 300,000 (axons) or < 500,000 (somas) uniquely mapped reads, Spearman correlation to other samples < 0.4 or < 2,500 genes expressed at RPKM > 0.1. If one or more of these criteria were not met, samples were excluded. To ensure that axonal samples to be used for analysis were not cross-contaminated with cell somas, during either the cell seeding process or the lysis, we conducted Spearman correlation, unsupervised hierarchical clustering and principal component analysis of all samples that passed the quality control. Axonal samples that clustered together with soma samples in these analyses were removed from further analyses. These samples typically displayed numbers of detected genes in the range for soma samples rather than other axonal samples.

Differential gene expression analysis was performed in R using DESeq2 version 1.12.4 (Love et al., 2014). Only genes with expression in at least four samples (irrespective of sample type) were considered for analysis. P-values were adjusted for multiple testing using the default Benjamini & Hochberg correction with FDR set to 10%, after which an adjusted p-value of < 0.05 was considered significant. All heatmaps were generated in R using *euclidean distance* as clustering method where applicable. Gene Ontology analyses were conducted using PantherDB (Mi et al., 2017) with the full *Mus musculus* background gene list. Gene set enrichment analyses (GSEA) were performed in R using the fgsea-package (version 1.2.1, available on: <https://github.com/ctlab/fgsea>). Gene sets were obtained from the Broad Institute Molecular Signatures Database (MSigDB v6.1, available on: <https://software.broadinstitute.org/gsea/msigdb/>). The used gene sets for testing were the hallmark (H), curated (C2) and GO-term-derived (C5) gene sets, as well as two custom gene sets for nuclear- and mitochondrial-encoded subunits for the respiratory electron chain. For comparison of mouse with human RNA-seq data, the Ensembl BioMart database was used to scan for orthologs between species. Only genes with known orthologs were used in the comparison to avoid inflating the proportion of non-overlapping genes.

### **Use of published datasets**

All data used in cross-comparisons of datasets were obtained from the NCBI Gene Expression Omnibus except data pertaining to the study by Rotem et al. (2017), as no GEO submission was available. Here, a table of raw counts from a supplemental table of the article was used. The GEO accession numbers and their respective study



references for the axonal transcriptomics studies are as follows: GEO: GSE51572 (Minis et al., 2014), GEO: GSE66230 (Briese et al., 2016), GEO: GSE59506 (Saal et al., 2014). Data from single mESC-derived motor neurons was obtained from GEO: GSE76514 (Nichterwitz et al., 2016). Data from purified astrocytes, microglia and OPCs was obtained from GEO: GSE52564 (Zhang et al., 2014). In all cases for RNA-seq, data was remapped and RPKM values calculated using the pipeline described above, to avoid differential mapping bias. As this was not possible for the data from Rotem et al. the counts table provided was used.

## References

- Briese, M., Saal, L., Appenzeller, S., Moradi, M., Baluapuri, A., and Sendtner, M. (2016). Whole transcriptome profiling reveals the RNA content of motor axons. *Nucleic Acids Res* *44*, e33.
- Di Giorgio, F.P., Boulting, G.L., Bobrowicz, S., and Eggan, K.C. (2008). Human embryonic stem cell-derived motor neurons are sensitive to the toxic effect of glial cells carrying an ALS-causing mutation. *Cell stem cell* *3*, 637-648.
- Guo, W., Naujock, M., Fumagalli, L., Vandoorne, T., Baatsen, P., Boon, R., Ordovas, L., Patel, A., Welters, M., Vanwelden, T., *et al.* (2017). HDAC6 inhibition reverses axonal transport defects in motor neurons derived from FUS-ALS patients. *Nature communications* *8*, 861.
- Kim, D., Langmead, B., and Salzberg, S.L. (2015). HISAT: a fast spliced aligner with low memory requirements. *Nature methods* *12*, 357-360.
- Kiskinis, E., Sandoe, J., Williams, L.A., Boulting, G.L., Moccia, R., Wainger, B.J., Han, S., Peng, T., Thams, S., Mikkilineni, S., *et al.* (2014). Pathways disrupted in human ALS motor neurons identified through genetic correction of mutant SOD1. *Cell stem cell* *14*, 781-795.
- Lawrence, M., Huber, W., Pages, H., Aboyoun, P., Carlson, M., Gentleman, R., Morgan, M.T., and Carey, V.J. (2013). Software for computing and annotating genomic ranges. *PLoS Comput Biol* *9*, e1003118.
- Love, M.I., Huber, W., and Anders, S. (2014). Moderated estimation of fold change and dispersion for RNA-seq data with DESeq2. *Genome Biol* *15*, 550.
- Mi, H., Huang, X., Muruganujan, A., Tang, H., Mills, C., Kang, D., and Thomas, P.D. (2017). PANTHER version 11: expanded annotation data from Gene Ontology and Reactome pathways, and data analysis tool enhancements. *Nucleic Acids Res* *45*, D183-d189.
- Minis, A., Dahary, D., Manor, O., Leshkowitz, D., Pilpel, Y., and Yaron, A. (2014). Subcellular transcriptomics-dissection of the mRNA composition in the axonal compartment of sensory neurons. *Dev Neurobiol* *74*, 365-381.
- Nichterwitz, S., Chen, G., Aguila Benitez, J., Yilmaz, M., Storvall, H., Cao, M., Sandberg, R., Deng, Q., and Hedlund, E. (2016). Laser capture microscopy coupled

with Smart-seq2 for precise spatial transcriptomic profiling. *Nature communications* 7, 12139.

Picelli, S., Bjorklund, A.K., Faridani, O.R., Sagasser, S., Winberg, G., and Sandberg, R. (2013). Smart-seq2 for sensitive full-length transcriptome profiling in single cells. *Nature methods* 10, 1096-1098.

Rotem, N., Magen, I., Ionescu, A., Gershoni-Emek, N., Altman, T., Costa, C.J., Gradus, T., Pasmank-Chor, M., Willis, D.E., Ben-Dov, I.Z., *et al.* (2017). ALS Along the Axons - Expression of Coding and Noncoding RNA Differs in Axons of ALS models. *Sci Rep* 7, 44500.

Saal, L., Briese, M., Kneitz, S., Glinka, M., and Sendtner, M. (2014). Subcellular transcriptome alterations in a cell culture model of spinal muscular atrophy point to widespread defects in axonal growth and presynaptic differentiation. *RNA* 20, 1789-1802.

Schindelin, J., Arganda-Carreras, I., Frise, E., Kaynig, V., Longair, M., Pietzsch, T., Preibisch, S., Rueden, C., Saalfeld, S., Schmid, B., *et al.* (2012). Fiji: an open-source platform for biological-image analysis. *Nature methods* 9, 676-682.

Thams, S., Lowry, E.J., Larraufie, M-H., Spiller, K.J., Li, H., Williams, D.J., Hoang, P., Jiang, E., Williams, L.A., Sandoe, J., *et al.* (2018). A stem cell-based screening platform identifies compounds that desensitize motor neurons to endoplasmic reticulum stress. *Molecular Therapy*. doi: <https://doi.org/10.1016/j.ymthe.2018.10.010>

Wang, F., Flanagan, J., Su, N., Wang, L.C., Bui, S., Nielson, A., Wu, X., Vo, H.T., Ma, X.J., and Luo, Y. (2012). RNAscope: a novel in situ RNA analysis platform for formalin-fixed, paraffin-embedded tissues. *The Journal of molecular diagnostics : JMD* 14, 22-29.

Zhang, Y., Chen, K., Sloan, S.A., Bennett, M.L., Scholze, A.R., O'Keefe, S., Phatnani, H.P., Guarnieri, P., Caneda, C., Ruderisch, N., *et al.* (2014). An RNA-sequencing transcriptome and splicing database of glia, neurons, and vascular cells of the cerebral cortex. *J Neurosci* 34, 11929-11947.
